# Supplementary material for: Functional health literacy in a population-based sample in Florence: a cross-sectional study using the Newest Vital Sign
Source: PubMed Central journal article supplement — BMJ Open. 2019 Jun 19;9(6):e026356. doi: 10.1136/bmjopen-2018-026356 (PMC6589023; doi:10.1136/bmjopen-2018-026356), 2019-06-19
Supplement: bmjopen-2018-026356.draft_revisions.pdf [file bmjopen-2018-026356.draft_revisions.pdf]

# BMJ Open

BMJ Open is committed to open peer review. As part of this commitment we make the peer review history of every article we publish publicly available.

When an article is published we post the peer reviewers' comments and the authors' responses online. We also post the versions of the paper that were used during peer review. These are the versions that the peer review comments apply to.

The versions of the paper that follow are the versions that were submitted during the peer review process. They are not the versions of record or the final published versions. They should not be cited or distributed as the published version of this manuscript.

BMJ Open is an open access journal and the full, final, typeset and author-corrected version of record of the manuscript is available on our site with no access controls, subscription charges or pay-per-view fees (<http://bmjopen.bmj.com>).

If you have any questions on BMJ Open's open peer review process please email [info.bmjopen@bmj.com](mailto:info.bmjopen@bmj.com)

# BMJ Open

## Functional Health Literacy in a population-based sample in Florence: an assessment using the Newest Vital Sign

|                               |                                                                                                                                                                                                                                                                                                                                                                                                                 |
|-------------------------------|-----------------------------------------------------------------------------------------------------------------------------------------------------------------------------------------------------------------------------------------------------------------------------------------------------------------------------------------------------------------------------------------------------------------|
| Journal:                      | <i>BMJ Open</i>                                                                                                                                                                                                                                                                                                                                                                                                 |
| Manuscript ID                 | bmjopen-2018-026356                                                                                                                                                                                                                                                                                                                                                                                             |
| Article Type:                 | Research                                                                                                                                                                                                                                                                                                                                                                                                        |
| Date Submitted by the Author: | 28-Aug-2018                                                                                                                                                                                                                                                                                                                                                                                                     |
| Complete List of Authors:     | Bonaccorsi, Guglielmo; University of Florence, Department of Health Sciences<br>Lastrucci, Vieri; University of Florence, Department of Health Sciences<br>Vettori, Virginia; University of Florence, Department of Health Sciences<br>Florence Health Literacy, Research Group; University of Florence, Department of Health Sciences<br>Lorini, Chiara; University of Florence, Department of Health Sciences |
| Keywords:                     | Functional Health Literacy, PUBLIC HEALTH, Population-Based Sample, Newest Vital Sign, Antecedents, Consequences                                                                                                                                                                                                                                                                                                |
|                               |                                                                                                                                                                                                                                                                                                                                                                                                                 |

SCHOLARONE™  
Manuscripts

Peer Review Only

1  
2  
3 **Functional Health Literacy in a population-based sample in Florence: an assessment using the Newest**  
4 **Vital Sign**

5  
6 Guglielmo Bonaccorsi<sup>1</sup>, Vieri Lastrucci<sup>1\*</sup>, Virginia Vettori<sup>1</sup>, Florence Health Literacy Research Group<sup>^</sup>, Chiara  
7 Lorini<sup>1</sup>,  
8

9  
10  
11 <sup>^</sup> Florence Health Literacy Research Group: Elisabetta Alti<sup>3</sup>, Sergio Baglioni<sup>3</sup>, Angela Bechini<sup>1</sup>, Leonardo  
12 Bellino<sup>3</sup>, Niccolò Berzi<sup>3</sup>, Jacopo Bianchi<sup>2</sup>, Sara Boccalini<sup>1</sup>, Guglielmo Bonaccorsi <sup>1</sup>, Giuseppe Burgio<sup>3</sup>,  
13 Alessandro Bussotti<sup>4</sup>, Marco Del Riccio<sup>1</sup>, Martina Donzellini<sup>2</sup>, Angela Galdiero<sup>5</sup>, Alessandro Grassi<sup>3</sup>,  
14 Tommaso Grassi<sup>2</sup>, Vieri Lastrucci<sup>1</sup>, Arrigo Lombardi<sup>3</sup>, Chiara Lorini<sup>1</sup>, Sarah Mantwill<sup>6</sup>, Federico Manzi<sup>2</sup> ,  
15 Alessandro Mereu<sup>3</sup>, Donatella Messina<sup>3</sup>, Chiara Milani<sup>2</sup>, Diana Paolini<sup>2</sup>, Marco Targonato<sup>3</sup>, Marco  
16 Toccafondi<sup>3</sup>, Gino Sartor<sup>2</sup>, Virginia Vettori<sup>1</sup>  
17  
18

- 19  
20  
21  
22  
23  
24  
25  
26  
27  
28  
29
1. Department of Health Science, University of Florence, Florence, Italy
  2. School of Specialization in Hygiene and Preventive Medicine, University of Florence, Florence, Italy
  3. General Practitioner, Local Health Unit of Central Tuscany, Florence, Italy
  4. Careggi University Hospital, Florence, Italy
  5. Local Health Unit of Central Tuscany, Florence, Italy
  6. Department of Health Sciences & Health Policy, University of Lucerne, Lucerne, Switzerland

30 \*Corresponding author:

31 Vieri Lastrucci; e-mail: [vieri.lastrucci@unifi.it](mailto:vieri.lastrucci@unifi.it); Postal address: Viale Morgagni, 48, 50134 Firenze, Italy  
32  
33  
34

35 Word count: 4256 words  
36  
37  
38  
39  
40  
41  
42  
43  
44  
45  
46  
47  
48  
49  
50  
51  
52  
53  
54  
55  
56  
57  
58  
59  
60

## ABSTRACT

**Objectives** To assess the level of functional health literacy (HL) and its antecedents and consequences in an adult population-based sample, using the Italian version of Newest Vital Sign (NVS-IT)

**Design** Cross-sectional randomized study

**Setting** General population

**Participants:** 984 subjects were randomly selected from the registries of eleven general practitioners; 452 subjects completed the study. Inclusion criteria were the following: 18–69 years of age and Italian speaking. Exclusion criteria included cognitive impairment, severe psychiatric diseases and end-stage diseases.

**Outcome measures:** HL levels as assessed by the NVS-IT and the following potential HL predictors and consequences were assessed using logistic regression models: sociodemographic characteristics, body mass index, presence of long-term illnesses, self-reported health status, health services use in the last 12 months.

**Results:** High likelihood of limited HL, possibility of limited HL and adequate HL were found in 11.5%, 24.6% and 63.9% of the sample, respectively. The results of the multivariate logistic model for the antecedents showed that the risk of having high likelihood or possibility of limited HL levels increases with age (OR = 1.07, 95% CI 1.05 to 1.09), lower educational level (OR = 4.03; 95% CI 3.41 to 7.49) and with worse financial situation (OR 1.64; 95% CI 1.17-2.63). As far as health outcomes are concerned, HL resulted to be positively associated with self-reported health status (OR = 2.25, 95% CI 1.75 to 2.75).

**Conclusions:** findings show a good level of functional HL in the population. However, older, less educated and poorer population groups showed to have a higher likelihood of suffering from limited or inadequate HL. Efforts should be made to design and implement public health policies and interventions tailored to different HL levels.

**Trial registration number** Local Health Unit of Central Tuscany, Careggi University hospital and Meyer University Children's Hospital; Ref. CEAVC:10113, 01 December 2016

## STRENGTHS AND LIMITATION OF THIS STUDY

- This study provide a measure of functional health literacy in a population-based sample in Florence
- The sample has not been randomly selected among people living in Florence, but from individuals registered as patients with eleven general practitioners
- Differently from other studies, the Italian version of the Newest Vital Sign (NVS-IT) was administered through phone-interview
- The concordance between face-to-face and phone-administered NVS-IT interviews was pre-tested on 35 participants
- Predictors and outcomes of NVS-IT were analyzed using logistic regression models, with results quite different from other published studies

## INTRODUCTION

Health literacy (HL) can be defined as “the capacities of people to meet complex demands of health in a modern society and it concerns the ability of citizens to make sound decisions concerning health in daily life- at home, at work, in health care, [..]”. [1] Several studies have shown that limited HL among adults is a major public health problem. Limited HL has been shown to be associated with several health-related consequences such as adverse health behaviors and outcomes, increased mortality risk, poor management of chronic diseases, lower use of preventive services and higher health care costs.[2-4] As far as predictors of HL (i.e. antecedents) are concerned, several proximal (i.e. personal and situational) and distal (i.e. societal and environmental) factors have been proposed.[2-4]

Functional HL is one dimension of the concept of HL that entails the ability to interpret, calculate and act on oral and written information in health care settings. Several tools have been proposed for assessing functional HL,[5, 6] however most of them take several minutes to administer. This is an issue that poses barriers in their use outside of academic contexts, especially for time-demanding clinical settings or for interventions in the general population. In 2005, the Newest Vital Sign (NVS) was proposed as a brief and easy to administer screening tool for measuring HL.[7] The NVS is a six-items screening tool that requires the participants to interpret the information presented on a nutrition label; it assesses reading, numeracy and comprehension skills. The NVS shows high sensitivity in detecting limited literacy.[8]

The NVS was originally developed and is still mainly used in the clinical setting.[7, 9-11] Until today, there have been only limited studies on HL assessed with the NVS and its antecedents and consequences carried out in the general population. Furthermore, since most studies have been conducted in clinical settings,[7, 9-11] the assessed individuals have specific demographic and characteristics that pertain to the environment of the studies. Moreover, the included samples typically tend to over-represent socially disadvantaged groups.[12]

In 2011, the HLS-EU survey was the first study assessing HL at the general population level in several European countries. [3] The HL measure used in this study was specifically designed for the study (i.e. HLS-EU-Q47), however translated versions of the NVS were also included in the study. The study reported that around 12% of the sample was very likely to have limited literacy. Age and education resulted to significantly predict NVS scores in all the countries included in the study. However, several causal inferences for HL measured with the NVS were not examined as the NVS tool was mainly used for comparing and validating the newly developed HL measure. Furthermore, in this study the Italian population was not included. A study recently conducted in Portugal found that people with limited HL were significantly older and less educated.[13] Whereas a study conducted in Australian population reported also male gender, foreign nationality and socioeconomic status as predictors of inadequate HL, and, for what concern HL consequences, the study found that low HL levels were associated with a higher risk of chronic diseases and a lower access to primary care services. [14] As far as the Italian population is concerned, the Italian version of the NVS (NVS-IT) has been recently validated and a few studies have been conducted using this tool.[15] However, these studies were either conducted in small convenience samples or in specific clinical contexts.[16, 17]

Due to still limited evidence in the literature, there is no general consensus on antecedents and consequences of HL when measured with the NVS in the general population. Furthermore, as HL and its antecedents and consequences may vary from one country to another, results are not generalizable. In order to deepen knowledge on HL in the general population and to provide reliable and specific

1  
2  
3 information on the Italian population, a research project that aimed at assessing HL levels in a population-  
4 based sample, and to validate different HL measures in Italian language was carried out. This study is the  
5 first output of this research project, of which a full protocol has been published and detailed elsewhere.[18]  
6 Specifically, the aim of the present study was to evaluate the levels and the associations of HL in an adult  
7 general population using the Italian version of the Newest Vital Sign (NVS-IT).  
8  
9

## 10 11 **METHODS**

12  
13 For more detailed information regarding the methods, the reader is referred to the study protocol  
14 published elsewhere.[18] The study was approved by the Ethics Committee of the “*Area Vasta Centro*”  
15 (Local Health Unit of Central Tuscany, Careggi University hospital and Meyer University Children’s Hospital;  
16 Ref. CEAVC:10113, 01 December 2016) and was conducted according to the principles described in the  
17 Declaration of Helsinki.  
18  
19

### 20 **Study population and sampling criteria**

21  
22 The study at hand is a cross-sectional study that was carried out in a population-based sample. Participants  
23 were randomly selected from the registries of eleven general practitioners (GPs) working in primary  
24 healthcare centers of the municipality of Florence—a sampling method that has been also suggested by  
25 other authors.[19] The GPs were recruited using convenience criteria. Both the president of the Provincial  
26 Medical Council and the representative of the GPs at the University Hospital of Florence informed their  
27 colleagues to join the study either via email, phone or in person. The first eleven, who voluntarily joined the  
28 study, were included. Each GP was asked to randomly select 80 subjects among those registered as patients  
29 with them. Inclusion criteria were the following: 18–69 years of age and Italian speaking (since the survey  
30 was conducted in Italian only). Exclusion criteria included cognitive impairment, severe psychiatric diseases  
31 and end-stage diseases.  
32  
33  
34

### 35 **Procedures: data collection and measurements**

36  
37 Data were collected between February 2017 and December 2017. Each selected subject was contacted via  
38 postal mail. Subjects received an information sheet signed by both the GP and the person in charge of the  
39 study. The letter also included a short description of the study, an invitation to participate and a consent  
40 form. Participants were asked to sign the consent form and return it via mail to the researchers in charge.  
41 The mail also contained the nutritional label of the Newest Vital Sign-Italian (NVS-IT). After receipt of the  
42 signed consent forms, the subjects were contacted over phone for the computer-assisted interview. Nine  
43 interviewers conducted the phone interviews. A shared written protocol on how to conduct the interview  
44 was followed in order to standardize the interviews and to limit interviewer bias. Each subject was  
45 randomly assigned to one of the nine interviewers and contacted a maximum of six times before being  
46 considered unreachable. The interviews took about 20–25 minutes.  
47  
48  
49

50 The following “antecedents” variables were collected: gender, birth year, nationality, number of years living  
51 in Italy (for those who were born abroad), educational level, marital status, number of family members  
52 living in the same household. Furthermore, the questionnaire also explored whether one has ever received  
53 training or is/has been employed in the field of healthcare, employment status (currently having a paid  
54 job), financial situation, and whether a family member or a friend normally accompanies him/her to  
55 medical appointments.  
56  
57  
58  
59

1  
2  
3 As for health outcomes, the following variables were investigated: self-reported health status (excellent,  
4 very good, good, so-so/fair, bad), referred weight and height to calculate the body mass index (BMI), health  
5 services used in the last 12 months (number of doctor visits, hospital admissions, emergency department  
6 visits). Responses were coded as follows: 0, 1–2 times, 3–5 times, 6 times or more, don't know, refusal).  
7 The use of other healthcare services in the 12 last months were also investigated (overall number of  
8 dentist, physiotherapist, psychologist, dieticians and optician visits). To measure health status, subjects  
9 were also asked about long-term illnesses (illnesses that have lasted or are expected to last for at least  
10 6 months), coded in five categories: yes, more than one; yes, one; no; don't know, refusal.  
11  
12

13 The NVS-IT consists of an ice cream nutrition label, with seven associated questions that measure literacy  
14 and numeracy. It produces a final score ranging from 0 to 6, allowing subjects to be classified into three  
15 categories—high likelihood of limited HL (score: 0–1), possibility of limited HL (score: 2–3) and adequate HL  
16 (score: 4–6). To the best of our knowledge, no published studies have reported NVS data collected through  
17 telephone interviews. Due to that, the concordance between face-to-face and phone-administered NVS-IT  
18 interviews was pre-tested in a convenience sample of 35 participants of different age, gender and  
19 educational level. For testing the concordance between face-to-face and phone-administered NVS-IT two  
20 study arms were defined. In both arms, the participants received both the telephone and the face-to-face  
21 interview with a washout period of 10 days between them. The two arms differed only in the sequence in  
22 which the participants received the telephone or the face-to-face interview first. Each participant  
23 was randomly assigned to one of the two arms.  
24  
25

### 26 **Statistical analysis**

27 Collected variables were tested for normality using Kolmogorov-Smirnov test.  
28  
29

30 In the pre-testing phase, NVS-IT scores obtained using the telephonic and face-to-face interviews were  
31 compared. Specifically, between the two arms, NVS-IT score distributions were compared both at T0 and at  
32 T1 using unpaired Student's t-test or Mann-Whitney U test; within the two arms, NVS-IT score distributions  
33 at T0 were compared with respect to those obtained at T1 using paired Student's t-test or Wilcoxon paired  
34 test for matched data.  
35  
36

37 The internal consistency of NVS-IT was assessed through the Cronbach's alpha coefficient.  
38

39 For all the analyses, subjects with high likelihood of limited HL and those with possibility of limited HL were  
40 grouped together in a single group, referred to "Inadequate and at-risk HL" and compared with the  
41 adequate HL group.[14]  
42

43 A descriptive univariate analysis using  $\chi^2$  test for categorical and ordinal data and unpaired Student's t-test,  
44 ANOVA or the corresponding non-parametric tests for continuous data were performed in order to  
45 evaluate significant associations between NVS-IT categories and all the variables considered. To analyze the  
46 predictors of HL, antecedents significantly correlated with NVS-IT categories at the univariate analysis were  
47 entered into a multivariate logistic regression model considering the NVS-IT categories ("Inadequate and  
48 at-risk HL" vs "adequate HL") as the dependent variable. NVS-IT as a predictor of health related outcomes  
49 (self-reported health status, BMI categories, health services used in the last 12 months) was tested in  
50 several multivariate logistic regression models. Specifically, health related outcomes significantly  
51 associated with NVS-IT categories at the univariate analysis were entered into different multivariate logistic  
52 regression models as dependent variables (one for each), dichotomizing the categories as follow:  
53 "excellent or good" vs "average or poor" for self-reported health status; "underweight or normal" vs  
54 "overweight or obese" for BMI categories; "never" vs "one or more times" for health services used in the  
55  
56  
57  
58  
59

last 12 months. In each model, predictors (antecedents) of NVS-IT categories were included as covariates. Each multivariate regression model was performed using a backward stepwise procedure. For each analysis, an  $\alpha$  level of 0.05 is considered as significant. The statistical softwares IBM SPSS Statistics for Windows, V.25.0 and StataC V.11 (StataCorp) were used for data analyses.

### Patient and public involvement

The study population was not directly involved in the design, recruitment and conduct of this study. However, the Florence Health Literacy Research Group involved representatives from Provincial Medical Council, Local Health Unit and University Hospital of Florence. All of these representatives were involved in the study design and questionnaire development and will disseminate the results from this work.

## RESULTS

### Pre-testing phase: face-to-face versus phone-administered interviews

Thirty-five volunteers (48.6% females; mean age: 44.3±15.8 years; ) were included in the pre-testing phase, with a similar distribution in the two arms: for 18 subjects (51.4%), NVS-IT was administered face-to-face first. Both mean age and educational level were not significantly different between the two arms (respectively, Mann-Whitney U test:  $p=0.946$ ,  $\chi^2$  test:  $p=0.07$ ). At T0, NVS-IT score for the face-to-face administered interviewed was 4.11±1.66 while for the phone administered interviewed it was 4.76±1.43, without statistically significant differences (Mann-Whitney U test:  $p=0.207$ ). At T1, with the different administration, both groups increased the mean NVS-IT scores (from 4.11±1.66 to 4.67±1.49 and from 4.76±1.43 to 5.10±1.43) but not in a statistically significant way (Wilcoxon paired test for matched data:  $p=0.065$  and  $p=0.160$ , respectively). At T1, the NVS-IT scores were not significantly different between the two groups as well (Mann-Whitney U test:  $p=0.335$ ).

### Sample characteristics

A total of 984 individuals were invited to participate in the study, of which 454 (46.1%) were interviewed. As far as non-participation reasons are concerned, 151 (15.3% of the total sample) subjects refused to participate for lack of time or interest in the study and 376 (38.2% of the total sample) subjects resulted to be unreachable either because the number was not answering or in service anymore. Non-participants resulted to be on average two year younger than participants (51.2 ±11.8 years and 53.3±11.7 years, respectively). No significant gender differences emerged between participants and non-participants. Two interviews resulted to have several data missing and were excluded from the study; a total sample of 452 subjects were considered for the analyses.

The participants' characteristics are presented in Table 1. The mean age of the sample is 53.2±11.7 years and males represent 41.2% of the sample. Graduated participants represent the 41.2% of the sample and 17.3% of the participants easily get at the end of the month with their income.

**Table 1.** Socio-Demographic characteristics and Newest Vital Sign (NVS) (N = 452)<sup>^</sup>

|     | High likelihood of limited HL<br>n(%) | Possibility of limited HL<br>n(%) | Adequate HL<br>n(%) | Total<br>n(%) |
|-----|---------------------------------------|-----------------------------------|---------------------|---------------|
| All | 52(11.5)                              | 111(24.6)                         | 289(63.9)           | 452(100)      |



|                                                                                                          |                               |              |            |             |             |
|----------------------------------------------------------------------------------------------------------|-------------------------------|--------------|------------|-------------|-------------|
|                                                                                                          | Female                        | 30(11.3)     | 62(23.3)   | 174(65.4)   | 266(58.8)   |
|                                                                                                          | Male                          | 22(11.8)     | 49(26.3)   | 115(61.8)   | 186(41.2)   |
|                                                                                                          | Age <sup>o</sup>              | 59.44 ± 9.61 | 57.79±9.88 | 50.40±11.77 | 53.25±11.72 |
| <b>Nationality</b>                                                                                       |                               |              |            |             |             |
|                                                                                                          | Italian                       | 50(11.3)     | 110(24.8)  | 283(63.9)   | 443(98)     |
|                                                                                                          | Foreign                       | 2(22.2)      | 1(11.1)    | 6(66.7)     | 9(2)        |
| <b>Educational level*</b>                                                                                |                               |              |            |             |             |
|                                                                                                          | Bachelor's degree and higher  | 9(4.8)       | 33(17.7)   | 144(77.4)   | 186(41.1)   |
|                                                                                                          | High school degree            | 26(13.5)     | 49(25.5)   | 117(60.9)   | 192(42.5)   |
|                                                                                                          | Less than high school diploma | 17(23.0)     | 29(39.2)   | 28(37.8)    | 74(16.4)    |
| <b>Employment status*</b>                                                                                |                               |              |            |             |             |
|                                                                                                          | Employed                      | 27(9.0)      | 57(19.1)   | 215(71.9)   | 299(66.2)   |
|                                                                                                          | Unemployed or retired         | 25(16.3)     | 54(35.3)   | 74(48.4)    | 153(33.8)   |
|                                                                                                          | Retired                       | 20(20.6)     | 37(38.1)   | 40(41.2)    | 97(21.5)    |
| <b>Marital status</b>                                                                                    |                               |              |            |             |             |
|                                                                                                          | Single                        | 7(10)        | 15(21.4)   | 48(68.6)    | 70(15.5)    |
|                                                                                                          | Married/domestic partnership  | 36(11.2)     | 79(24.7)   | 205(64.1)   | 320(70.8)   |
|                                                                                                          | In a relationship             | 1(8.3)       | 1(8.3)     | 10(83.3)    | 12(2.7)     |
|                                                                                                          | Divorced or separated         | 3(8.8)       | 10(29.4)   | 21(61.8)    | 34(7.5)     |
|                                                                                                          | Widowed                       | 5(33.3)      | 6(40)      | 4(26.7)     | 15(3.3)     |
|                                                                                                          | Refusal                       | 0(0.0)       | 0(0.0)     | 1(100)      | 1(0.2)      |
| <b>Self-reported health status*</b>                                                                      |                               |              |            |             |             |
|                                                                                                          | Excellent/good                | 33(9.5)      | 74(21.3)   | 241(69.2)   | 348(77)     |
|                                                                                                          | Average/ poor                 | 19(18.4)     | 36(35.0)   | 48(46.6)    | 103(22.8)   |
|                                                                                                          | Refusal                       | 0(0.0)       | 1(100)     | 0(0.0)      | 1(0.2)      |
| <b>Long-term illness*</b>                                                                                |                               |              |            |             |             |
|                                                                                                          | No                            | 27           | 50         | 160         | 237         |
|                                                                                                          | One                           | 11           | 43         | 93          | 147         |
|                                                                                                          | More than one                 | 14           | 17         | 36          | 67          |
|                                                                                                          | Refusal                       | 0            | 1          | 0           | 1           |
| <b>BMI class</b>                                                                                         |                               |              |            |             |             |
|                                                                                                          | Underweight                   | 2(13.3)      | 1(6.7)     | 12(80)      | 15(3.3)     |
|                                                                                                          | Normal                        | 28(11.2)     | 59(23.6)   | 163(65.2)   | 250(55.3)   |
|                                                                                                          | Overweight                    | 16(10.7)     | 40(26.7)   | 94(62.7)    | 150(33.2)   |
|                                                                                                          | Obese                         | 6(16.7)      | 11(30.6)   | 19(52.8)    | 36(8.0)     |
| <b>Family members in the household*</b>                                                                  |                               |              |            |             |             |
|                                                                                                          | Alone                         | 6(9.0)       | 20(29.9)   | 41(61.2)    | 67(14.8)    |
|                                                                                                          | 2 people                      | 23(15.2)     | 40(26.5)   | 88(58.3)    | 151(33.4)   |
|                                                                                                          | 3 or more people              | 22(9.6)      | 51(20.5)   | 156(68.1)   | 229(50.7)   |
| <b>Experience in the healthcare field</b>                                                                |                               |              |            |             |             |
|                                                                                                          | Yes                           | 10(10.2)     | 22(22.4)   | 66(67.3)    | 98(21.7)    |
|                                                                                                          | No                            | 42(11.9)     | 89(25.1)   | 223(63.0)   | 354(78.3)   |
| <b>Financial resources at disposal from own or family income enough to get to the end of the month *</b> |                               |              |            |             |             |
|                                                                                                          | More than enough/Enough       | 29(12.8)     | 75(16.7)   | 212(70.5)   | 316(17.3)   |
|                                                                                                          | Barely enough/Not enough      | 23(17.4)     | 34(25.8)   | 75(56.2)    | 132(29.2)   |
|                                                                                                          | Refusal                       | 0(0.0)       | 2(50.0)    | 2(50.0)     | 4(0.9)      |
| <b>Family or friends support to go to doctors visit (if needed)</b>                                      |                               |              |            |             |             |
|                                                                                                          | Yes                           | 44(11.3)     | 98(25.3)   | 246(63.4)   | 388(85.8)   |
|                                                                                                          | No                            | 8(13.1)      | 11(18.0)   | 42(68.9)    | 61(13.5)    |
|                                                                                                          | Refusal                       | 0(0.0)       | 2(66.7)    | 1(33.3)     | 3(0.7)      |
| <b>Doctor visits</b>                                                                                     |                               |              |            |             |             |
|                                                                                                          | 0                             | 5(16.7)      | 6(20.0)    | 19(63.3)    | 30(6.6)     |
|                                                                                                          | 1-2 times                     | 19(9.7)      | 43(21.9)   | 134(68.4)   | 196(43.4)   |
|                                                                                                          | 3 or more times               | 28(12.4)     | 62(27.4)   | 136(61.3)   | 226(50.0)   |

| <b>Hospitalizations</b>                   |                 |          |           |           |           |
|-------------------------------------------|-----------------|----------|-----------|-----------|-----------|
|                                           | 0               | 37(10.5) | 83(23.6)  | 231(65.8) | 351(77.7) |
|                                           | 1-2 times       | 14(15.4) | 26(28.6)  | 51(56.0)  | 91(20.1)  |
|                                           | 3 or more times | 1(10.0)  | 2(20.0)   | 7(70.0)   | 10(2.2)   |
| <b>Emergency department admissions</b>    |                 |          |           |           |           |
|                                           | 0               | 43(10.7) | 100(24.9) | 258(64.3) | 401(88.7) |
|                                           | 1-2 times       | 9(19.6)  | 9(19.6)   | 28(60.9)  | 46(10.2)  |
|                                           | 3 or more times | 0(0.0)   | 2(40.0)   | 3(60.0)   | 5(1.1)    |
| <b>Outpatients specialist care access</b> |                 |          |           |           |           |
|                                           | 0               | 9(14.8)  | 16(26.2)  | 36(59.0)  | 61(13.5)  |
|                                           | 1-2 times       | 15(9.3)  | 42(25.9)  | 105(64.8) | 162(35.8) |
|                                           | 3 or more times | 28(12.3) | 53(23.2)  | 147(64.5) | 228(50.4) |
|                                           | Refusal         | 0(0.0)   | 0(0.0)    | 1(100)    | 1(0.2)    |

^Difference between 100% and the sum of the percentages of each variable corresponds to missing values

°Kruskal-Wallis test:  $p < 0.05$ ; \*Fisher exact test:  $p < 0.05$

### Health literacy distribution and its associations with antecedents and consequences

The Cronbach alpha coefficient for the NVS-IT in this study was 0.741. The NVS-IT score was J-shaped (Figure 1), with mean value of  $4.05 \pm 1.88$  and median value of 4; 25% of the participants presented NVS-IT scores lower than 3. As far as the HL levels distribution in the sample are concerned, high likelihood of limited HL, possibility of limited HL and adequate HL were found in the 11.5%, 24.6% and 63.9% of the sample, respectively.

Inadequate and at-risk HL was significantly associated with the following variables at the univariate analyses (see Table 1): age, educational level, employment status, financial situation, number of family members in the household, self-reported health status, and the presence of long-term illnesses.

The variables statistically associated with inadequate and at-risk HL in the univariate analyses were included in the multivariate logistic regression model. The results of the multivariate logistic regression model for the antecedents are shown in table 2. In particular, the risk of having inadequate and at-risk HL levels increases with age (OR = 1.07,  $p < 0.001$ ), with a lower educational level (OR = 2.02,  $p = 0.004$  and OR = 4.03;  $p < 0.001$  comparing the bachelor's degree and higher educational level group with high school degree group or with less than a high school diploma group, respectively) and with a worse financial situation (OR 1.64;  $p = 0.041$ ).

**Table 2.** Multivariate logistic regression analysis for antecedents of HL (HL is the outcome variable). OR is calculated as "Inadequate and at-risk HL" vs "adequate HL".

|                                 | <b>Odds Ratio</b> | <b>p</b> | <b>95% Confidence interval</b> |
|---------------------------------|-------------------|----------|--------------------------------|
| <b>Age</b>                      | 1.07              | 0.000    | 1.05-1.09                      |
| <b>Education</b>                |                   |          |                                |
| Bachelor's degree and higher    | 1.000             | -        | -                              |
| High school graduates           | 2.01              | 0.004    | 1.53-3.61                      |
| Less than a high school diploma | 4.03              | 0.000    | 3.41-7.49                      |
| <b>Financial situation</b>      |                   |          |                                |
| More than enough/Enough         | 1                 | -        | -                              |
| Barely enough/Not enough        | 1.639             | 0.041    | 1.17-2.63                      |

N= 448; Pseudo  $R^2 = 0.1404$

As far as health outcomes are concerned, HL resulted to be significantly associated only with self-reported health status at the univariate analysis. Besides HL, age, educational level, nationality, long-term illness, employment and financial status resulted to be significantly associated with self-reported health status (data not shown). These variables were included in the multivariate logistic regression model with self-reported health status as dependent variable. Results of the final model are reported in table 3. Participants with inadequate and at-risk HL were about two times more likely than participants with adequate HL to report a worse self-reported health status (OR = 2.25,  $p = 0.002$ ). The presence of one or more long-term illnesses and a worse financial situation remained significantly associated with a worse self-reported health status in the final model (see table 3).

**Table 3.** Multivariate logistic regression analysis with self-reported health status as dependent variable

|                             | Odds Ratio | <i>p</i> | 95% Confidence interval |
|-----------------------------|------------|----------|-------------------------|
| <b>Health literacy (HL)</b> |            |          |                         |
| Adequate HL                 | 1          | -        | -                       |
| Inadequate and at-risk HL   | 2.25       | 0.002    | 1.75-2.75               |
| <b>Long-term illness</b>    |            |          |                         |
| No                          | 1          | -        | -                       |
| One                         | 4.04       | 0.000    | 3.46-4.62               |
| More than one               | 12.78      | 0.000    | 12.1- 13.45             |
| <b>Financial situation</b>  |            |          |                         |
| More than enough/Enough     | 1          | -        | -                       |
| Barely enough/Not enough    | 2.14       | 0.004    | 1.62-2.66               |

N=448; Pseudo  $R^2=1.179$

## DISCUSSION

The aim of this study was to assess the level of HL in a population-based sample using the Italian validated version of the NVS and the association of HL with antecedents and health outcomes.[15] A total of 11.5% of the surveyed sample had inadequate level of health literacy. According to multivariate analyses, the following antecedents resulted significantly associated with the level of HL: age, educational level and financial situation. As far as health outcomes are concerned, only self-reported health status resulted significantly associated with HL in the multivariate analysis.

Our results showed the presence of a good level of HL score in the population when compared to what has been registered in other European countries involved in the European Health Literacy Project.[3] Indeed, it is possible to observe that the functional HL level in our population is higher than in the European countries considered, with the exception of Austria and the Netherlands (i.e. the average score of the European countries is 3.5 varying from a minimum of 2.6 of Spain to a maximum of 4.5 of Netherlands). Furthermore, the observed standard deviation of the HL score mean is well below the European countries average, probably indicating a relatively homogeneity in terms of distribution of HL in our population.

As far as the assessment of HL in Italian population, to best of our knowledge our study is the first that has set the assessment of HL with a validated NVS tool in a population-based sample as primary outcome. Indeed, in the literature only a study of Palumbo *et al.*[20] have used the NVS tool in a population-based sample in Italy, however in this study the primary outcomes were to assess HL and its antecedents and consequences with HLS-EU-Q47 and NVS was used to check the validity of self-reported literacy skills (HLS-

1  
2  
3 EU-Q47). As a result of this, several data of the NVS in the population are not reported (i.e. NVS score) and  
4 it is not possible to compare our findings with this study.  
5

6 In the literature, many studies have described several antecedents that may positively or negatively impact  
7 on health literacy, however to date there is no consistency in discussing these predictors.[4] Furthermore,  
8 demographic and socio-economic factors may impact differently on HL depending on the national and  
9 cultural contexts.[3, 13, 14, 21] In light of this, our findings on antecedents of HL not only contribute with  
10 evidences to the current debate in the literature, but also may be considered as the first attempt to  
11 highlight the independent predictors of HL in the Italian context.  
12  
13

14 Age and education in the literature seem to be important predictors of HL and our finding confirmed it also  
15 in the Italian context.[3, 13, 14] In our study, a higher education level resulted to be independently  
16 associated to higher HL levels; on the contrary, having received training or being employed in the field of  
17 healthcare does not impact on HL level. As the NVS tool mainly measures document literacy and numeracy,  
18 these findings may suggest that these skills are mainly developed in the context of general education with  
19 little influence by further and more specific education. Regarding age, results showed a negative  
20 independent association with HL suggesting that as age increases, a diminished mental alertness and/or  
21 cognitive impairment (e.g. memory-retrieval problems and inadequate numeracy) may play a crucial role in  
22 limiting the HL skills. As older and less-educated people are those who experience the highest burden and  
23 consequences of chronic diseases,[22-25] these results urge to design and implement health policies  
24 tailored on HL skills in these populations in order to allow them to better prevent and cope with the  
25 challenges posed by these conditions.  
26  
27  
28

29 Our findings have highlighted also that a worse financial situation is associated with lower level of HL.  
30 Literature, reports contrasting results concerning the association between socioeconomic status and HL  
31 measured through NVS score;[13-14, 26] however these variables has been little investigated by  
32 population-based studies which considered also the measure of functional HL. It may be hypothesized that  
33 socioeconomic status is a moderator or a mediator in the causal pathway between education level and  
34 document literacy and numeracy skills and thus may probably influence the HL measured with NVS;  
35 however, further studies that take into consideration mechanisms underlying these causal relationships are  
36 needed to draw a definite conclusion on the role played by the socioeconomic status.  
37  
38  
39

40 As regards to health outcomes, self-reported health status was found to be significantly associated with HL,  
41 but also with financial situation and the presence of long-term illnesses. In the literature the underlying  
42 mechanism through which HL influences the health-related outcomes is not entirely known and several  
43 theoretical models have been proposed to explain the underlying mechanism through which HL influence  
44 the health status.[4, 27-29] A recent conceptual model proposed by Sørensen et al.[4] posits that the HL  
45 dimensions (the competencies related to the process of accessing, understanding, appraising and applying  
46 health-related information) influence the ability of a person to navigate in the three domains of the health  
47 continuum (Health care, Disease prevention and Health promotion) which in turn have an impact on health  
48 outcomes. However, none of these models has been fully validated and further studies examining the  
49 mechanisms underlying the relationship between HL and health outcomes are needed.  
50  
51

52 No other health outcomes resulted to be significantly associated with HL in our study. Although several HL  
53 associations with health outcomes have been proposed in the literature, most of them have been  
54 evaluated in the clinical context and only few at the general population level.[3, 13-14] Because NVS was  
55 primarily designed to detect illiteracy, it may show a ceiling effect when used in general populations.[30]  
56  
57  
58  
59

1  
2  
3 This ceiling effect could have skewed the distribution of NVS scores significantly, and lead to attenuated or  
4 absent correlations between HL and health outcomes in studies using NVS tool at the general population  
5 level. A more in-depth evaluation of the presence and effects of skewed distribution of NVS is needed in  
6 order to better adjust and calibrate this HL screening tool to use it appropriately in the general population,  
7 which in turn may permit to draw more robust conclusions on the presence and strengths of HL  
8 associations with health outcomes.  
9

10  
11 In this study, telephone interviews were used to collect NVS-IT data, while in almost all the studies face-to-  
12 face interviews were used. To date, to the best of our knowledge, our study is the first in reporting the  
13 comparison of NVS data collected using different methods of administration. The comparison of the NVS  
14 score between face-to-face and telephone interviews showed higher concordance degree with no  
15 significant difference between the NVS scores. Compared with face-to-face interviews, telephone  
16 interviews offer several advantages,[31] in particular the elimination of any bias caused by the appearance  
17 of the interviewer. Moreover, there is some evidence that people are more likely to report health-related  
18 events on the phone rather than in face-to-face interviews.[31] The main potential risk with telephone  
19 interview compared with face-to face is that the respondent may seek help from another person at home;  
20 however, this risk is minor,[31] since the interviewer would be able to notice the involvement of other  
21 people (*i.e.*, the person on the phone would have to repeat each question or use the hands-free mode).  
22  
23

24  
25 This is the first study in Italy that comprehensively attempts to assess HL and its related antecedents and  
26 outcomes with NVS in a population-based sample. This consideration, together with the evaluation of  
27 various potential HL consequences, antecedents, and confounding factors, should be considered as the  
28 strengths of this study.  
29

30  
31 Nevertheless, the study has several limitations. Indeed, as the variables have been self-reported by the  
32 participants through interviews, the study may have suffered the recognized limitations of using this  
33 approach, such as recall or social desirability bias. However, the telephone interview may have limited this  
34 potential bias especially for those variables potentially more influenced by social desirability such as the  
35 BMI and socioeconomic Status. Moreover, results may have been influenced by a non-response bias,  
36 however the extent of this potential bias – if present - is limited as participants and non-participants  
37 showed only a small difference in the mean age: since participants were older of two years on average  
38 than non-participants the HL level resulted in our sample may be slightly lower than in the general  
39 population. Finally, although participants were randomly selected from the registries of the GPs, the GPs  
40 were selected using a convenience criteria, which may have introduced a selection bias. To limit this  
41 potential bias, GPs were chosen according to their geographical location in the aim of covering different  
42 districts of Florence, and - in order to extend the geographical coverage of the sample - the foreseen  
43 number of GPs recruited in the original protocol[18] has been augmented to eleven.  
44  
45  
46  
47  
48

## 49 **CONCLUSION**

50  
51 Our study is the first in measuring the HL with NVS tool and its associations with antecedents and  
52 consequences at population level in Italy. Our findings highlighted the presence of good level of HL in the  
53 population compared to the EU average. However, older, less educated and poorer population groups  
54 resulted at higher risk of limited or inadequate HL. These results suggest the need to design and implement  
55 health policies and interventions tailored on different HL levels in order to allow the more vulnerable  
56 population groups to better cope with the health challenges. As far as health outcomes are concerned, only  
57  
58  
59  
60

1  
2  
3 self-reported health status was found to be significantly associated with HL among the considered health  
4 outcomes. The underlying mechanisms through which HL influences the health-related outcomes are not  
5 entirely known and a more in-depth evaluation of these relationships are needed. As NVS test was  
6 originally developed in the clinical context, a ceiling effect that may skew the HL levels distribution in the  
7 population may occur when NVS is used at the general population level, ultimately leading to attenuated  
8 correlation between HL and its potential predictors and consequences. Further studies investigating the  
9 presence and effects of this ceiling effect is needed in order to confirm the validity or better calibrate the  
10 NVS tool for the general population studies and to draw more robust conclusions on the presence and  
11 strengths of HL associations.  
12  
13

#### 14 **ACKNOWLEDGMENTS**

15  
16 The authors gratefully acknowledge Dr. Flavio Godi, Mauro Grazini and Poste Italiane for their assistance in  
17 the study implementation and conduct. The authors also thank the subjects whose participation made this  
18 study possible  
19

#### 20 **COMPETING INTERESTS**

21  
22 The authors declare no competing interests  
23

#### 24 **FUNDING STATEMENTS**

25  
26 This research received no specific grand form any funding agency in the public, commercial or not-for-profit  
27 sectors  
28  
29

#### 30 **AUTHOR CONTRIBUTION**

31  
32 GB: conception and design; drafted the article; gave final approval of the version to be submitted.

33 VL: conception and design; data collection; data interpretation; drafted the article; gave final approval of  
34 the version to be submitted; final preparation and submission.

35 VV: conception and design; data collection; data interpretation; drafted the article; gave final approval of  
36 the version to be submitted.  
37

38 CL: conception and design; data analysis and interpretation; drafted the article; gave final approval of the  
39 version to be submitted.

40 Florence Health Literacy Research Group: conception and design; data collection; gave final approval of the  
41 version to be submitted  
42  
43

#### 44 **FIGURE LEGEND**

45  
46 Figure 1. Distribution of NVS-IT score  
47  
48  
49

#### 50 **REFERENCES**

- 51 1. Kickbush I, Maag D. Health Literacy. In: Heggenhougen K, Quah S, eds. International encyclopedia of  
52 public health volume 3. San Diego, CA: *Academic Press* 2008:204-211.
- 53 2. Berkman ND, Sheridan SL, Donahue KE, et al. Low health literacy and health outcomes: an updated  
54 systematic review. *Ann Intern Med* 2011;155(2):97-107. doi:10.7326/0003-4819-155-2-201107190-  
55 00005  
56  
57  
58  
59



3. HLS-EU Consortium. 2012. Comparative report on health literacy in eight EU member states. The European health literacy survey HLS-EU. [http://ec.europa.eu/chafea/documents/news/Comparative\\_report\\_on\\_health\\_literacy\\_in\\_eight\\_EU\\_member\\_states.pdf](http://ec.europa.eu/chafea/documents/news/Comparative_report_on_health_literacy_in_eight_EU_member_states.pdf)
4. Sørensen K, Van den Broucke S, Fullam J, et al. Health literacy and public health: a systematic review and integration of definitions and models. *BMC Public Health* 2012;12(1):80. doi:10.1186/1471-2458-12-80
5. Altin SV, Finke I, Kautz-Freimuth S, et al. The evolution of health literacy assessment tools: a systematic review. *BMC Public Health* 2014;14:1207. doi:10.1186/1471-2458-14-1207
6. Nguyen TH, Paasche-Orlow MK, McCormack LA. The state of the science of health literacy measurement. *Stud Health Technol Inform* 2017;240:17-33.
7. Weiss BD, Mays MZ, Martz W, et al. Quick assessment of literacy in primary care: the newest vital sign. *Ann Fam Med* 2005;3(6):514–22.
8. Osborn CY, Weiss BD, Davis TC, et al. Measuring adult literacy in health care: performance of the newest vital sign. *Am J Health Behav* 2007;31 Suppl 1:S36-46. doi:10.5555/ajhb.2007.31.suppl.S36
9. Shah LC, West P, Bremmeyer K, et al. Health literacy instrument in family medicine: the "newest vital sign" ease of use and correlates. *J Am Board Fam Med* 2010;23(2):195-203. doi:10.3122/jabfm.2010.02.070278
10. Powers BJ, Trinh JV, Bosworth HB. Can this patient read and understand written health information? *JAMA* 2010;304(1):76-84. doi:10.1001/jama.2010.896
11. Strijbos RM, Hinnen JW, van den Haak RFF, et al. Inadequate health literacy in patients with arterial vascular disease. *Eur J Vasc Endovasc Surg* 2018; 1-7. doi:10.1016/j.ejvs.2018.04.015
12. Batterham RW, Hawkins M, Collins PA, et al. Health literacy: applying current concepts to improve health services and reduce health inequalities. *Public Health* 2016;132:3-12. doi:10.1016/j.puhe.2016.01.001
13. Paiva D, Silva S, Severo M, et al. Limited health literacy in Portugal assessed with the newest vital sign. *Acta Med Port* 2017;30(12):861-869. doi:10.20344/amp.9135
14. Adams RJ, Appleton SL, Hill CL, et al. Risks associated with low functional health literacy in an Australian population. *Med J Aust* 2009;191(10), 530-534.
15. Capecchi L, Guazzini A, Lorini C, et al. The first Italian validation of the most widespread health literacy assessment tool: the newest vital sign. *Epidemiol Prev* 2015;39(4 Suppl 1):124–8.
16. Bonaccorsi G, Grazzini M, Pieri L, et al. Assessment of health Literacy and validation of single-item literacy screener (SILS) in a sample of Italian people. *Ann Ist Super Sanita* 2017;53(3):205-212. doi:10.4415/ANN\_17\_03\_05
17. Zotti P, Cocchi S, Polesel J, et al. Cross-cultural validation of health literacy measurement tools in Italian oncology patients. *BMC Health Serv Res* 2017;17(1):410. doi: 10.1186/s12913-017-2359-0
18. Lorini C, Santomauro F, Grazzini M, et al. Health literacy in Italy: a cross-sectional study protocol to assess the health literacy level in a population-based sample, and to validate health literacy measures in the Italian language. *BMJ Open* 2017;7:e017812. doi:10.1136/bmjopen-2017-017812
19. Toçi E, Burazeri G, Myftiu S, et al. Health literacy in a population-based sample of adult men and women in a South Eastern European country. *J Public Health (Oxf)* 2016;38(1):6–13. doi:10.1093/pubmed/fdv006
20. Palumbo R, Annarumma C, Adinolfi P, et al. The Italian health literacy project: insights from the assessment of health literacy skills in Italy. *Health Policy* 2016;120(9):1087-94. doi:10.1016/j.healthpol.2016.08.007
21. Bakker CJ, Koffel JB, Theis-Mahon NR. Measuring the health literacy of the Upper Midwest. *J Med Libr Assoc* 2017;105(1):34-43. doi:10.5195/jmla.2017.105
22. GBD 2016 Causes of Death Collaborators. Global, regional, and national age-sex specific mortality for 264 causes of death, 1980–2016: a systematic analysis for the Global Burden of Disease Study 2016. *Lancet* 2017;390(10100):1151-1210. doi:10.1016/S0140-6736(17)32152-9

- 1
- 2
- 3 23. Steenland K, Henley J, Thun M. All-cause and cause-specific death rates by educational status for two
- 4 million people in two American Cancer Society cohorts, 1959-1996. *Am J Epidemiol* 2002;156(1):11-21.
- 5 doi:10.1093/aje/kwf001
- 6 24. Qureshi AI, Suri MF, Saad M, et al. Educational attainment and risk of stroke and myocardial infarction.
- 7 *Med Sci Monit* 2003;9(11):CR466-73.
- 8 25. Silventoinen K, Pankow J, Jousilahti P, et al. Educational inequalities in the metabolic syndrome and
- 9 coronary heart disease among middle-aged men and women. *Int J Epidemiol* 2005;34(2):327-34.
- 10 doi:10.1093/ije/dyi007
- 11 26. Barber MN, Staples M, Osborne RH, et al. Up to a quarter of the Australian population may have
- 12 suboptimal health literacy depending upon the measurement tool: results from a population-based
- 13 survey. *Health Promot Int* 2009;24, 3: 252–261. doi:10.1093/heapro/dap022
- 14 27. Nutbeam D. Health literacy as a public health goal: a challenge for contemporary health education and
- 15 communication strategies into the 21st century. *Health Promot Int* 2000;15:259–67.
- 16 doi:10.1093/heapro/15.3.259
- 17 28. Paasche-Orlow MK, Wolf MS. The causal pathways linking health literacy to health outcomes. *Am J*
- 18 *Health Behav* 2007;31 Suppl 1:S19–26. doi:10.5555/ajhb.2007.31.suppl.S19
- 19 29. von Wagner C, Steptoe A, Wolf MS, et al. Health literacy and health actions: a review and a framework
- 20 from health psychology. *Health Educ Behav* 2009;36(5):860–77. doi:10.1177/1090198108322819
- 21 30. Reeve CL, Basalik D. Is health literacy an example of construct proliferation? A conceptual and empirical
- 22 evaluation of its redundancy with general cognitive ability. *Intelligence* 2014;44:93-102.
- 23 doi:10.1016/j.intell.2014.03.004
- 24 31. Streiner DL, Norman GR. Health measurement scales. A practical guide to their development and use.
- 25 Oxford:Oxford University Press, 2008.
- 26
- 27
- 28
- 29
- 30
- 31
- 32
- 33
- 34
- 35
- 36
- 37
- 38
- 39
- 40
- 41
- 42
- 43
- 44
- 45
- 46
- 47
- 48
- 49
- 50
- 51
- 52
- 53
- 54
- 55
- 56
- 57
- 58
- 59
- 60



1  
2  
3  
4  
5  
6  
7  
8  
9  
10  
11  
12  
13  
14  
15  
16  
17  
18  
19  
20  
21  
22  
23  
24  
25  
26  
27  
28  
29  
30  
31  
32  
33  
34  
35  
36  
37  
38  
39  
40  
41  
42  
43  
44  
45  
46  
47  
48  
49  
50  
51  
52  
53  
54  
55  
56  
57  
58  
59  
60

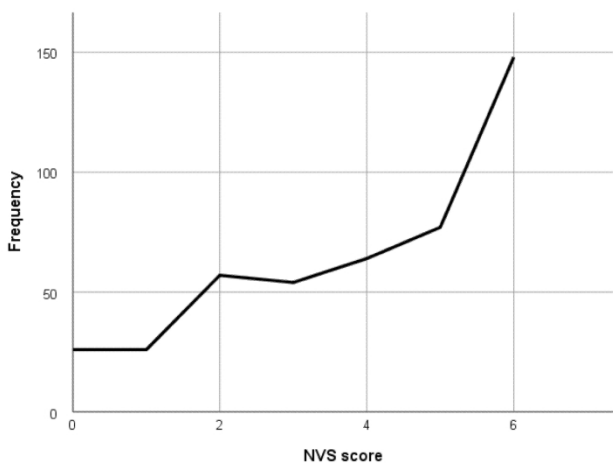

Figure 1. Distribution of NVS-IT score  
209x148mm (300 x 300 DPI)

**STROBE 2007 (v4) Statement—Checklist of items that should be included in reports of *cross-sectional studies***

| Section/Topic                | Item # | Recommendation                                                                                                                                                                       | Reported on page # |
|------------------------------|--------|--------------------------------------------------------------------------------------------------------------------------------------------------------------------------------------|--------------------|
| Title and abstract           | 1      | (a) Indicate the study's design with a commonly used term in the title or the abstract                                                                                               | 1; 2               |
|                              |        | (b) Provide in the abstract an informative and balanced summary of what was done and what was found                                                                                  | 2                  |
| <b>Introduction</b>          |        |                                                                                                                                                                                      |                    |
| Background/rationale         | 2      | Explain the scientific background and rationale for the investigation being reported                                                                                                 | 3                  |
| Objectives                   | 3      | State specific objectives, including any prespecified hypotheses                                                                                                                     | 4                  |
| <b>Methods</b>               |        |                                                                                                                                                                                      |                    |
| Study design                 | 4      | Present key elements of study design early in the paper                                                                                                                              | 4; 5               |
| Setting                      | 5      | Describe the setting, locations, and relevant dates, including periods of recruitment, exposure, follow-up, and data collection                                                      | 4; 5               |
| Participants                 | 6      | (a) Give the eligibility criteria, and the sources and methods of selection of participants                                                                                          | 4                  |
| Variables                    | 7      | Clearly define all outcomes, exposures, predictors, potential confounders, and effect modifiers. Give diagnostic criteria, if applicable                                             | 5                  |
| Data sources/<br>measurement | 8*     | For each variable of interest, give sources of data and details of methods of assessment (measurement). Describe comparability of assessment methods if there is more than one group | 4; 5               |
| Bias                         | 9      | Describe any efforts to address potential sources of bias                                                                                                                            | 4; 5; 6            |
| Study size                   | 10     | Explain how the study size was arrived at                                                                                                                                            | 4                  |
| Quantitative variables       | 11     | Explain how quantitative variables were handled in the analyses. If applicable, describe which groupings were chosen and why                                                         | 5; 6               |
| Statistical methods          | 12     | (a) Describe all statistical methods, including those used to control for confounding                                                                                                | 5; 6               |
|                              |        | (b) Describe any methods used to examine subgroups and interactions                                                                                                                  | 5; 6               |
|                              |        | (c) Explain how missing data were addressed                                                                                                                                          |                    |
|                              |        | (d) If applicable, describe analytical methods taking account of sampling strategy                                                                                                   |                    |
|                              |        | (e) Describe any sensitivity analyses                                                                                                                                                |                    |
| <b>Results</b>               |        |                                                                                                                                                                                      |                    |

|                          |     |                                                                                                                                                                                                              |         |
|--------------------------|-----|--------------------------------------------------------------------------------------------------------------------------------------------------------------------------------------------------------------|---------|
| Participants             | 13* | (a) Report numbers of individuals at each stage of study—eg numbers potentially eligible, examined for eligibility, confirmed eligible, included in the study, completing follow-up, and analysed            | 6       |
|                          |     | (b) Give reasons for non-participation at each stage                                                                                                                                                         | 6       |
|                          |     | (c) Consider use of a flow diagram                                                                                                                                                                           |         |
| Descriptive data         | 14* | (a) Give characteristics of study participants (eg demographic, clinical, social) and information on exposures and potential confounders                                                                     | 7       |
|                          |     | (b) Indicate number of participants with missing data for each variable of interest                                                                                                                          | 7       |
| Outcome data             | 15* | Report numbers of outcome events or summary measures                                                                                                                                                         | 7       |
| Main results             | 16  | (a) Give unadjusted estimates and, if applicable, confounder-adjusted estimates and their precision (eg, 95% confidence interval). Make clear which confounders were adjusted for and why they were included | 7; 8; 9 |
|                          |     | (b) Report category boundaries when continuous variables were categorized                                                                                                                                    |         |
|                          |     | (c) If relevant, consider translating estimates of relative risk into absolute risk for a meaningful time period                                                                                             |         |
| Other analyses           | 17  | Report other analyses done—eg analyses of subgroups and interactions, and sensitivity analyses                                                                                                               |         |
| <b>Discussion</b>        |     |                                                                                                                                                                                                              |         |
| Key results              | 18  | Summarise key results with reference to study objectives                                                                                                                                                     | 9       |
| Limitations              | 19  | Discuss limitations of the study, taking into account sources of potential bias or imprecision. Discuss both direction and magnitude of any potential bias                                                   | 11      |
| Interpretation           | 20  | Give a cautious overall interpretation of results considering objectives, limitations, multiplicity of analyses, results from similar studies, and other relevant evidence                                   | 10; 11  |
| Generalisability         | 21  | Discuss the generalisability (external validity) of the study results                                                                                                                                        | 11      |
| <b>Other information</b> |     |                                                                                                                                                                                                              |         |
| Funding                  | 22  | Give the source of funding and the role of the funders for the present study and, if applicable, for the original study on which the present article is based                                                | 12      |

\*Give information separately for cases and controls in case-control studies and, if applicable, for exposed and unexposed groups in cohort and cross-sectional studies.

**Note:** An Explanation and Elaboration article discusses each checklist item and gives methodological background and published examples of transparent reporting. The STROBE checklist is best used in conjunction with this article (freely available on the Web sites of PLoS Medicine at <http://www.plosmedicine.org/>, Annals of Internal Medicine at <http://www.annals.org/>, and Epidemiology at <http://www.epidem.com/>). Information on the STROBE Initiative is available at [www.strobe-statement.org](http://www.strobe-statement.org).

# BMJ Open

## Functional Health Literacy in a population-based sample in Florence: a cross-sectional study using the Newest Vital Sign

|                                 |                                                                                                                                                                                                                                                                                                                                                                                                                 |
|---------------------------------|-----------------------------------------------------------------------------------------------------------------------------------------------------------------------------------------------------------------------------------------------------------------------------------------------------------------------------------------------------------------------------------------------------------------|
| Journal:                        | <i>BMJ Open</i>                                                                                                                                                                                                                                                                                                                                                                                                 |
| Manuscript ID                   | bmjopen-2018-026356.R1                                                                                                                                                                                                                                                                                                                                                                                          |
| Article Type:                   | Research                                                                                                                                                                                                                                                                                                                                                                                                        |
| Date Submitted by the Author:   | 19-Feb-2019                                                                                                                                                                                                                                                                                                                                                                                                     |
| Complete List of Authors:       | Bonaccorsi, Guglielmo; University of Florence, Department of Health Sciences<br>Lastrucci, Vieri; University of Florence, Department of Health Sciences<br>Vettori, Virginia; University of Florence, Department of Health Sciences<br>Florence Health Literacy, Research Group; University of Florence, Department of Health Sciences<br>Lorini, Chiara; University of Florence, Department of Health Sciences |
| <b>Primary Subject Heading</b>: | Public health                                                                                                                                                                                                                                                                                                                                                                                                   |
| Secondary Subject Heading:      | Public health, Communication                                                                                                                                                                                                                                                                                                                                                                                    |
| Keywords:                       | Functional Health Literacy, PUBLIC HEALTH, Population-Based Sample, Newest Vital Sign, telephone interview, antecedents and consequences                                                                                                                                                                                                                                                                        |
|                                 |                                                                                                                                                                                                                                                                                                                                                                                                                 |

SCHOLARONE™  
Manuscripts

1  
2  
3  
4  
5  
6  
7  
8  
9  
10  
11  
12  
13  
14  
15  
16  
17  
18  
19  
20  
21  
22  
23  
24  
25  
26  
27  
28  
29  
30  
31  
32  
33  
34  
35  
36  
37  
38  
39  
40  
41  
42  
43  
44  
45  
46  
47  
48  
49  
50  
51  
52  
53  
54  
55  
56  
57  
58  
59  
60

## Functional Health Literacy in a population-based sample in Florence: a cross-sectional study using the Newest Vital Sign

Guglielmo Bonaccorsi<sup>1</sup>, Vieri Lastrucci<sup>1\*</sup>, Virginia Vettori<sup>1</sup>, Florence Health Literacy Research Group<sup>^</sup>, Chiara Lorini<sup>1</sup>,

<sup>^</sup> Florence Health Literacy Research Group: Elisabetta Alti<sup>3</sup>, Sergio Baglioni<sup>3</sup>, Angela Bechini<sup>1</sup>, Leonardo Bellino<sup>3</sup>, Niccolò Berzi<sup>3</sup>, Jacopo Bianchi<sup>2</sup>, Sara Boccalini<sup>1</sup>, Guglielmo Bonaccorsi <sup>1</sup>, Giuseppe Burgio<sup>3</sup>, Alessandro Bussotti<sup>4</sup>, Marco Del Riccio<sup>1</sup>, Martina Donzellini<sup>2</sup>, Angela Galdiero<sup>5</sup>, Alessandro Grassi<sup>3</sup>, Tommaso Grassi<sup>2</sup>, Vieri Lastrucci<sup>1</sup>, Arrigo Lombardi<sup>3</sup>, Chiara Lorini<sup>1</sup>, Sarah Mantwill<sup>6</sup>, Federico Manzi<sup>2</sup>, Alessandro Mereu<sup>3</sup>, Donatella Messina<sup>3</sup>, Chiara Milani<sup>2</sup>, Diana Paolini<sup>2</sup>, Marco Targonato<sup>3</sup>, Marco Toccafondi<sup>3</sup>, Gino Sartor<sup>2</sup>, Virginia Vettori<sup>1</sup>

1. Department of Health Science, University of Florence, Florence, Italy
2. School of Specialization in Hygiene and Preventive Medicine, University of Florence, Florence, Italy
3. General Practitioner, Local Health Unit of Central Tuscany, Florence, Italy
4. Careggi University Hospital, Florence, Italy
5. Local Health Unit of Central Tuscany, Florence, Italy
6. Department of Health Sciences & Health Policy, University of Lucerne, Lucerne, Switzerland

\*Corresponding author:

Vieri Lastrucci; e-mail: [vieri.lastrucci@gmail.com](mailto:vieri.lastrucci@gmail.com); Postal address: Viale Morgagni, 48, 50134 Firenze, Italy

Word count: 5109 words

## ABSTRACT

**Objectives** To assess the level of functional health literacy(HL) and its antecedents and consequences in an adult population-based sample, using the Italian version of Newest Vital Sign(NVS-IT)

**Design** Cross-sectional study

**Setting** General population

**Participants:** 984 people were randomly selected from the resident registers of eleven general practitioners; a total of 452 (46,2%) of the selected people completed the study. Inclusion criteria were the following: 18–69 years of age and Italian speaking. Exclusion criteria included cognitive impairment, severe psychiatric diseases and end-stage diseases.

**Outcome measures:** HL levels as assessed by the NVS-IT and the following potential HL predictors and consequences were assessed using logistic regression models: sociodemographic characteristics, body mass index, presence of long-term illnesses, self-reported health status, health services use in the last 12 months.

**Results:** High likelihood of limited HL, possibility of limited HL and adequate HL were found in 11.5%, 24.6% and 63.9% of the sample, respectively. The results of the multivariate logistic model for the antecedents showed that the risk of having high likelihood or possibility of limited HL levels increases with age (OR = 1.07, 95%CI 1.05 to 1.09), lower educational level (OR = 4.03; 95%CI 3.41 to 7.49) and with worse financial situation (OR 1.64; 95%CI 1.17-2.63). As far as health outcomes are concerned, HL resulted to be positively associated with self-reported health status (OR = 2.25, 95%CI 1.75 to 2.75).

**Conclusions:** Findings show a good level of functional HL in the population. However, older, less educated and poorer population groups showed to have a higher likelihood of suffering from limited or inadequate HL. Efforts should be made to design and implement public health policies and interventions tailored to different HL levels.

**Trial registration number** Local Health Unit of Central Tuscany, Careggi and Meyer University Hospitals; Ref. CEAVC:10113, 01 December 2016

## STRENGTHS AND LIMITATION OF THIS STUDY

- This study provides a measure of functional health literacy in a population-based sample in Florence
- The population based sample was obtained with a combination of convenience and probability sampling procedures
- Differently from other studies, the Italian version of the Newest Vital Sign (NVS-IT) was administered through phone-interview
- The concordance between face-to-face and phone-administered NVS-IT interviews was pre-tested on 35 participants
- Predictors and outcomes of NVS-IT were analyzed using logistic regression models, with results quite different from other published studies

## INTRODUCTION

Health literacy (HL) is closely linked to empowerment and concerns the knowledge and competences of individuals necessary for meeting the complex health demands of modern society. HL can be defined as “the ability of citizens to make sound decisions concerning health in daily life- at home, at work, in health care, at the market place and in the political arena”. [1] HL has been identified as a priority area for policy action in the strategy of the World Health Organization and in the policy documents of the European Commission. [2, 3] Indeed, several studies have shown that limited HL among adults is a major public health problem; limited HL has been shown to be associated with several health-related consequences such as adverse health behaviors and outcomes, increased mortality risk, poor management of chronic diseases, lower use of preventive services and higher health care costs.[4-6] As far as predictors of HL (i.e. antecedents) are concerned, several proximal (i.e. personal and situational) and distal (i.e. societal and environmental) factors have been proposed.[4-6]

Functional HL is one dimension of the concept of HL that entails the ability to interpret, calculate and act on oral and written information in health care settings. Several tools have been proposed for assessing functional HL,[7, 8] however most of them take several minutes to administer. This is an issue that poses barriers in their use outside of academic contexts, especially for time-demanding clinical settings or for interventions in the general population. In 2005, the Newest Vital Sign (NVS) was proposed as a brief and easy to administer screening tool for measuring HL.[9] The NVS is a six-items screening tool that requires the participants to interpret the information presented on a nutrition label; it assesses reading, numeracy and comprehension skills. The NVS demonstrated a high degree of correlation with other functional HL measures.[10]

The NVS was originally developed and is still mainly used in the clinical setting.[9, 11-13] To date, there have been only limited studies on HL assessed with the NVS and its antecedents and consequences carried out in the general population. Furthermore, since most studies have been conducted in clinical settings,[9, 11-13] the assessed individuals have specific demographic and characteristics that pertain to the environment of the studies; moreover, the included samples typically tend to under-represent socially disadvantaged groups.[14]

In 2011, the HLS-EU survey was the first study assessing HL at the general population level in several European countries.[5] The HL measure used in this study was specifically designed for the study (i.e. HLS-EU-Q47), however translated versions of the NVS were also included in the study. The study reported that around 12% of the sample was very likely to have limited literacy. Age and education resulted to be associated with NVS scores in all the countries included in the study. However, several causal inferences for HL measured with the NVS were not examined as the NVS tool was mainly used for comparing and validating the newly developed HL measure. Furthermore, in this study the Italian population was not included. A study recently conducted in Portugal found that people with limited HL were significantly older and less educated,[15] and a study conducted in Australian population also reported male sex, foreign nationality and socioeconomic status as predictors of inadequate HL.[16] As regards HL consequences, low HL levels were reported to be associated with a higher risk of chronic diseases and a lower access to primary care services.[16] As far as the Italian population is concerned, the Italian version of the NVS (NVS-IT) was developed from the European version used in the HLS-EU survey and its validation study was

1  
2  
3 recently published.[17, 18] To date, few studies have been conducted using the NVS-IT. However, these  
4 studies were either conducted with small convenience samples or in specific clinical contexts.[19, 20]  
5

6  
7 In the literature few studies have used the NVS to investigate HL and its associations in the general  
8 population.[5, 15, 16, 21] Furthermore, as HL and its antecedents and consequences may vary from one  
9 country to another, results are not generalizable. In order to deepen knowledge on HL in the general  
10 population and to provides reliable and specific information on the Italian population, a research project  
11 that aimed at assessing HL levels in a population-based sample, and to validate different HL measures in  
12 Italian language was carried out. This study is the first output of this research project, of which a full  
13 protocol has been published and detailed elsewhere.[22] Specifically, the aim of the present study was to  
14 evaluate the levels and the associations of HL in an adult general population using the Italian version of the  
15 Newest Vital Sign (NVS-IT).  
16  
17  
18  
19

## 20 **METHODS**

21  
22 For more detailed information regarding the methods, the reader is referred to the study protocol  
23 published elsewhere.[22] The study was approved by the Ethics Committee of the “*Area Vasta Centro*”  
24 (Local Health Unit of Central Tuscany, Careggi University hospital and Meyer University Children’s Hospital;  
25 Ref. CEAVC:10113, 01 December 2016) and was conducted according to the principles described in the  
26 Declaration of Helsinki.  
27  
28

### 29 **Study population and sampling criteria**

30  
31 This is a cross-sectional study that was carried out in a population-based sample. Participants were  
32 randomly selected from a list of residents available from the registers of eleven general practitioners (GPs)  
33 working in primary healthcare centers of the municipality of Florence. According to the regulations of the  
34 National Healthcare System and the Constitution of the Italian Republic, in Italy every Italian and Foreign  
35 resident over the age of 18 has to be registered in a general practice, and people are enrolled in the general  
36 practices according to their place of residence (percentage of resident population registered 98.8%). This  
37 sampling method was chosen with the aim of increasing the population participation rate as the invitation  
38 letter was jointly signed by the general practitioners and the researcher in charge of the study.[23]  
39  
40  
41  
42

43 The GPs were recruited using convenience criteria. All the GPs of the municipality of Florence were invited  
44 to join the study by both the Provincial Medical Council and the University Hospital of Florence. A total of  
45 11 GPs based in different districts of Florence were recruited on a first-come basis. The number of GPs  
46 recruited in the study was increased from what had been originally proposed in the study protocol (*i.e.* n=  
47 8) in order to extend the geographical coverage of the study.[22] The recruited general practices were  
48 based in the city center and in the inner and outer suburban areas of Florence.  
49  
50

51 Each GP selected 80 people from its register through a random number generator. Inclusion criteria were  
52 the following: 18–69 years of age and Italian speaking (since the survey was conducted in Italian only).  
53 Exclusion criteria included cognitive impairment, severe psychiatric diseases and end-stage diseases.  
54 Inclusion and exclusion criteria were applied by each GP independently.  
55  
56

### 57 **Procedures: data collection and measurements**



1  
2  
3 Data were collected between February 2017 and December 2017. Each selected person was contacted via  
4 postal mail. The selected people received an information sheet signed by both the GP and the person in  
5 charge of the study. The letter also included a short description of the study, an invitation to participate  
6 and a consent form. Participants were asked to sign the consent form and return it via mail to the  
7 researchers in charge. The mail also contained the nutritional label of the Newest Vital Sign-Italian (NVS-IT)  
8 designed to be easy readable (*i.e.* large font size and line-spacing). After receipt of the signed consent  
9 forms, the participants were contacted over phone for the computer-assisted interview. If the consent form  
10 was not received within two weeks, a follow-up phone call was made by the research group. The phone call  
11 served to clarify any questions and to identify and support people with difficulties in completing the  
12 consent form (*e.g.* reading difficulties). Nine interviewers conducted the phone interviews. A shared  
13 written protocol on how to conduct the interview was followed in order to standardize the interviews and  
14 to limit interviewer bias. Each participant was randomly assigned to one of the nine interviewers and  
15 contacted a maximum of six times before being considered unreachable. The whole interview took about  
16 20–25 minutes.

17  
18 The following “antecedents” variables were collected: sex, birth year, nationality, number of years living in  
19 Italy (for those who were born abroad), educational level, marital status, number of family and non-family  
20 members living in the same household. Furthermore, the antecedents variables also included whether one  
21 has ever received training or is/has been employed in the field of healthcare, employment status (currently  
22 having a paid job), financial situation, and whether a family member or a friend normally accompanies  
23 him/her to medical appointments.

24  
25 As for health outcomes, the following variables were investigated: self-reported health status (excellent,  
26 very good, good, so-so/fair, bad), self-reported weight and height to calculate the body mass index (BMI),  
27 health services used in the last 12 months (number of doctor visits, hospital admissions, emergency  
28 department visits). Responses were coded as follows: 0, 1–2 times, 3–5 times, 6 times or more, don’t know,  
29 refusal). The use of other healthcare services in the 12 last months was also investigated (overall number of  
30 dentist, physiotherapist, psychologist, dieticians and optician visits). To measure health status, participants  
31 were also asked about long-term illnesses (illnesses that have lasted or are expected to last for at least  
32 6 months), coded in five categories: yes, more than one; yes, one; no; don’t know, refusal.

33  
34 The NVS-IT consists of an ice cream nutrition label, with seven associated questions that measure literacy  
35 and numeracy.[18] It produces a final score ranging from 0 to 6, allowing participants to be classified into  
36 three categories—high likelihood of limited HL (score: 0–1), possibility of limited HL (score: 2–3) and  
37 adequate HL (score: 4–6). To the best of our knowledge, no published studies have reported NVS data  
38 collected through telephone interviews; for this reason, the concordance between face-to-face and phone-  
39 administered NVS-IT interviews was pre-tested in a convenience sample of 35 participants of different age,  
40 sex and educational level. This sample size was established considering a number of participants of about 5  
41 times the number of the items of the tool (*i.e.* NVS-IT) as suggested by Parker.[24] Furthermore, this  
42 sample size was chosen in line with the sample size requirements for estimating the value of intraclass  
43 correlation coefficient and the Cohen’s kappa agreement test as proposed by Bujang.[25, 26]

44  
45 For testing the concordance between face-to-face and phone-administered NVS-IT two study arms were  
46 defined. In both arms, the participants received both the telephone and the face-to-face interview with an  
47 interval period of 10 days. The two arms differed only in the sequence in which the participants received

1  
2  
3 the telephone or the face-to-face interview first. Each participant was randomly assigned to one of the two  
4 arms.  
5

### 6 **Statistical analysis**

7  
8 Collected variables were tested for normality using Kolmogorov-Smirnov test.  
9

10 For all the analyses, participants with high likelihood of limited HL and those with possibility of limited HL  
11 were grouped together in a single group, referred to “Inadequate and at-risk HL” and compared with the  
12 adequate HL group.[16]  
13

14  
15 In the pre-testing phase, NVS-IT scores obtained using the telephonic and face-to-face interviews were  
16 compared. Specifically, between the two arms, NVS-IT score distributions were compared both at T0 and at  
17 T1 using unpaired Student’s t-test or Mann–Whitney U test; within the two arms, NVS-IT score distributions  
18 at T0 were compared with respect to those obtained at T1 using paired Student’s t-test or Wilcoxon paired  
19 test for matched data. Intraclass correlation coefficient (ICC, two-way random, single measures, absolute  
20 agreement) was calculated in order to assess the correlation between the NVS scores obtained at T0 and  
21 T1, in the whole sample and in the two subgroups (telephonic vs face-to-face interviews; face-to-face vs  
22 telephonic interviews).  $\chi^2$  test was used to evaluate the association between the classification into two  
23 groups of HL (inadequate and at risk HL vs adequate HL) and the mode of administration at T0 and at T1,  
24 respectively. Moreover, Cohen’s kappa was calculated to assess the agreement in the classification into two  
25 groups of HL (inadequate and at risk HL vs adequate HL) at T0 and T1, in the whole sample and in the two  
26 subgroups (telephonic vs face-to-face interviews; face-to-face vs telephonic interviews). For Cohen’s kappa  
27 and ICC, the following interpretation was considered: poor agreement for values lower than 0.40, fair  
28 agreement for values comprised between 0.40 and 0.59, good agreement for values comprised between  
29 0.60 and 0.74, excellent agreement for values comprised between 0.75 and 1.00. [27]  
30  
31  
32  
33  
34

35 The internal consistency of NVS-IT was assessed through the Cronbach’s alpha coefficient.

36  
37 A descriptive univariate analysis using  $\chi^2$  test for categorical and ordinal data and unpaired Student’s t-test,  
38 ANOVA or the corresponding non-parametric tests (Mann–Whitney U test or Kruskal-Wallis test) for  
39 continuous data were performed in order to evaluate significant associations between NVS-IT categories  
40 and all the variables considered. To analyze the predictors of HL, all the evaluated antecedents (*i.e.* sex,  
41 age, nationality, educational level, marital status, number of family and non-family members in the same  
42 household, experience in the field of healthcare, employment status, financial situation, and family or  
43 friend support) were entered into a first multivariate logistic regression model considering the NVS-IT  
44 categories (“Inadequate and at-risk HL” vs “adequate HL”) as the dependent variable; a backward stepwise  
45 procedure was applied to obtain the final model of significant predictors of HL.  
46  
47  
48

49 NVS-IT as a predictor of health related outcomes (self-reported health status, BMI categories, health  
50 services used in the last 12 months) was tested in several multivariate logistic regression models.  
51 Specifically, health related outcomes significantly associated with NVS-IT categories at the univariate  
52 analysis were entered into different multivariate logistic regression models as dependent variables (one for  
53 each), dichotomizing the categories as follows: “excellent, very good or good” vs “so so/fair or bad” for self-  
54 reported health status; “underweight or normal” vs “overweight or obese” for BMI categories; “never” vs  
55 “one or more times” for health services used in the last 12 months. In each model, all the evaluated  
56 predictors (antecedents) of NVS-IT categories were included as covariates. Each multivariate regression  
57  
58  
59  
60

model was performed using a backward stepwise procedure. For each analysis, an  $\alpha$  level of 0.05 was considered as significant. The statistical softwares IBM SPSS Statistics for Windows, V.25.0 and StataIC V.11 (StataCorp) were used for data analyses.

### Patient and public involvement

The study population or the public were not involved in the conceptualization or carrying out of this research.

## RESULTS

### Pre-testing phase: face-to-face versus phone-administered interviews

Thirty-five volunteers (48.6% females; mean age:  $44.3 \pm 15.8$  years; 11.4% with less than high school degree and 45.7% with high school degree) were included in the pre-testing phase, with a similar distribution in the two arms: for 18 participants (51.4%), NVS-IT was administered face-to-face first. Both mean age and educational level were not significantly different between the two arms (respectively, Mann-Whitney U test:  $p=0.946$ ,  $\chi^2$  test:  $p=0.07$ ). At T0, NVS-IT score for the face-to-face administered interviewed was  $4.11 \pm 1.66$  while for the phone administered interviewed it was  $4.76 \pm 1.43$ , without statistically significant differences (Mann-Whitney U test:  $p=0.207$ ). At T0, the classification into two groups of HL (inadequate and at risk HL; adequate HL) did not significantly differ in the two arms ( $\chi^2$  test,  $p=0.328$ ) (Table 1).

At T1, with the different administration, both groups increased the mean NVS-IT scores (Figure 1) (from  $4.11 \pm 1.66$  to  $4.67 \pm 1.49$  and from  $4.76 \pm 1.43$  to  $5.10 \pm 1.43$ ) but not in a statistically significant way (Wilcoxon paired test for matched data:  $p=0.065$  and  $p=0.160$ , respectively). At T1, the NVS-IT scores and the classification into two groups of HL (inadequate and at risk HL; adequate HL) were not significantly different between the two arms as well (Mann-Whitney U test:  $p=0.335$ ;  $\chi^2$  test,  $p=0.939$ ) (Table 1).

Two scatterplots for the NVS score are reported in Figure 1. The ICC in the whole sample, in group I (face-to-face vs telephone interview) and in group II (telephone vs face-to-face interview) were 0.837 ( $p<0.001$ ), 0.824 ( $p<0.001$ ), and 0.843 ( $p<0.001$ ), respectively. Therefore, the agreement was excellent both in the whole sample and in the two subgroups. As far as the classification into two groups of HL (inadequate and at risk HL; adequate HL) is concerned, the agreement in the whole sample and in the two subgroups was fair (Cohen's Kappa values were 0.471,  $p=0.003$ ; 0.478,  $p=0.017$ ; and 0.463,  $p=0.05$  in the whole sample, in group I and in group II, respectively) (Table 1).

**Table 1.** Pre-testing phase: classification into two groups of HL (inadequate and at risk HL ; adequate HL) at T0 and T1. Whole sample and two subgroups (face-to-face vs telephone interview; telephone vs face-to-face interview).

|  | First administration<br>(T0) | Total | Cohen's<br>kappa |
|--|------------------------------|-------|------------------|
|  |                              |       |                  |

|                                               |                                   |                                  | <i>Inadequate and at-risk HL</i> | <i>Adequate HL</i> |    |                             |
|-----------------------------------------------|-----------------------------------|----------------------------------|----------------------------------|--------------------|----|-----------------------------|
| <b>Whole sample</b>                           | <b>Second administration (T1)</b> | <i>Inadequate and at-risk HL</i> | 5                                | 1                  | 6  | 0.471<br>( <i>p</i> =0.003) |
|                                               |                                   | <i>Adequate HL</i>               | 6                                | 23                 | 29 |                             |
|                                               | <b>Total</b>                      |                                  |                                  | 11                 | 24 |                             |
| <b>Group I (face-to-face vs telephone)*°</b>  | <b>Second administration (T1)</b> | <i>Inadequate and at-risk HL</i> | 3                                | 0                  | 3  | 0.478<br>( <i>p</i> =0.017) |
|                                               |                                   | <i>Adequate HL</i>               | 4                                | 11                 | 15 |                             |
|                                               | <b>Total</b>                      |                                  |                                  | 7                  | 11 |                             |
| <b>Group II (telephone vs face-to-face)*°</b> | <b>Second administration (T1)</b> | <i>Inadequate and at-risk HL</i> | 2                                | 1                  | 3  | 0.463<br>( <i>p</i> =0.05)  |
|                                               |                                   | <i>Adequate HL</i>               | 2                                | 12                 | 14 |                             |
|                                               | <b>Total</b>                      |                                  |                                  | 4                  | 13 |                             |

\*Distribution at T0 (group I vs group II):  $\chi^2$  test=0.957 (1 df); *p*=0.328

°Distribution at T1 (group I vs group II):  $\chi^2$  test=0.006 (1 df); *p*=0.939

### Sample characteristics

A total of 984 individuals were invited to participate in the study, of which 493 agreed to be interviewed (50.1%) and 454 (46.1%) were effectively interviewed. As far as non-participation reasons were concerned, 151 (15.3% of the total sample) people refused to participate, 340 (34.5% of the total sample) people did not respond to any contact attempts, and a further 39 (4% of the total sample) people initially agreed to be interviewed, but subsequently it was not possible to arrange an interview. Non-participants resulted to be on average two year younger than participants (51.2 ±11.8 years and 53.3±11.7 years, respectively). No significant sex differences emerged between participants and non-participants. Two interviews resulted to have several data missing and were excluded from the study; a total sample of 452 participants were considered for the analyses.

The participants' characteristics are presented in Table 2. The mean age of the sample was 53.2±11.7 years and males represented 41.2% of the sample. Participants with bachelor's degree or higher represented the 41.2% of the sample, and 17.3% of the participants easily got at the end of the month with their income.

**Table 2.** Socio-Demographic characteristics and Newest Vital Sign (NVS) (N = 452)^

|                                                                                                  | Total<br>n(% for<br>column) | Health Literacy (HL) levels<br>n(% for raw) |                              |                |
|--------------------------------------------------------------------------------------------------|-----------------------------|---------------------------------------------|------------------------------|----------------|
|                                                                                                  |                             | High likelihood<br>of limited HL            | Possibility of<br>limited HL | Adequate<br>HL |
| All                                                                                              | 452(100)                    | 52(11.5)                                    | 111(24.6)                    | 289(63.9)      |
| Female                                                                                           | 266(58.8)                   | 30(11.3)                                    | 62(23.3)                     | 174(65.4)      |
| Male                                                                                             | 186(41.2)                   | 22(11.8)                                    | 49(26.3)                     | 115(61.8)      |
| Age*                                                                                             | 53.25±11.72                 | 59.44 ± 9.61                                | 57.79±9.88                   | 50.40±11.77    |
| <b>Nationality</b>                                                                               |                             |                                             |                              |                |
| Italian                                                                                          | 443(98)                     | 50(11.3)                                    | 110(24.8)                    | 283(63.9)      |
| Foreign                                                                                          | 9(2)                        | 2(22.2)                                     | 1(11.1)                      | 6(66.7)        |
| <b>Educational level*</b>                                                                        |                             |                                             |                              |                |
| Bachelor's degree and higher                                                                     | 186(41.1)                   | 9(4.8)                                      | 33(17.7)                     | 144(77.4)      |
| High school degree                                                                               | 192(42.5)                   | 26(13.5)                                    | 49(25.5)                     | 117(60.9)      |
| Less than high school diploma                                                                    | 74(16.4)                    | 17(23.0)                                    | 29(39.2)                     | 28(37.8)       |
| <b>Employment status*</b>                                                                        |                             |                                             |                              |                |
| Employed                                                                                         | 299(66.2)                   | 27(9.0)                                     | 57(19.1)                     | 215(71.9)      |
| Unemployed or retired                                                                            | 153(33.8)                   | 25(16.3)                                    | 54(35.3)                     | 74(48.4)       |
| Retired                                                                                          | 97(21.5)                    | 20(20.6)                                    | 37(38.1)                     | 40(41.2)       |
| <b>Marital status</b>                                                                            |                             |                                             |                              |                |
| Single                                                                                           | 70(15.5)                    | 7(10)                                       | 15(21.4)                     | 48(68.6)       |
| Married/domestic partnership                                                                     | 320(70.8)                   | 36(11.2)                                    | 79(24.7)                     | 205(64.1)      |
| In a relationship                                                                                | 12(2.7)                     | 1(8.3)                                      | 1(8.3)                       | 10(83.3)       |
| Divorced or separated                                                                            | 34(7.5)                     | 3(8.8)                                      | 10(29.4)                     | 21(61.8)       |
| Widowed                                                                                          | 15(3.3)                     | 5(33.3)                                     | 6(40)                        | 4(26.7)        |
| Refusal                                                                                          | 1(0.2)                      | 0(0.0)                                      | 0(0.0)                       | 1(100)         |
| <b>Self-reported health status*</b>                                                              |                             |                                             |                              |                |
| Excellent                                                                                        | 27(6)                       | 3(11.1)                                     | 4(14.8)                      | 20(74.1)       |
| Very good                                                                                        | 113(25)                     | 9(8)                                        | 17(15)                       | 87(77)         |
| Good                                                                                             | 208(46)                     | 21(10.1)                                    | 53(25.5)                     | 134(64.4)      |
| So-so/fair                                                                                       | 93(20.6)                    | 15(16.1)                                    | 32(34.4)                     | 46(49.5)       |
| Bad                                                                                              | 10(2.2)                     | 4(40)                                       | 4(40)                        | 2(20)          |
| Refusal                                                                                          | 1(0.2)                      | 0(0)                                        | 1(100)                       | 0(0)           |
| <b>Long-term illness*</b>                                                                        |                             |                                             |                              |                |
| No                                                                                               | 237(52.4)                   | 27(11.4)                                    | 50(21.1)                     | 160(67.5)      |
| One                                                                                              | 147(32.5)                   | 11(7.5)                                     | 43(29.2)                     | 93(63.3)       |
| More than one                                                                                    | 67(14.8)                    | 14(20.9)                                    | 17(25.4)                     | 36(53.7)       |
| Refusal                                                                                          | 1(0.2)                      | 0(0.0)                                      | 1(100)                       | 0(0.0)         |
| <b>Body Mass Index class</b>                                                                     |                             |                                             |                              |                |
| Underweight/Normal                                                                               | 265(58.6)                   | 30(11.3)                                    | 60(22.6)                     | 175(66.0)      |
| Overweight/Obese                                                                                 | 186(41.2)                   | 22(11.8)                                    | 51(27.4)                     | 113(60.8)      |
| Refusal                                                                                          | 1(0.2)                      | 0(0.0)                                      | 0(0.0)                       | 1(100)         |
| <b>Family and non-family members in the household*</b>                                           |                             |                                             |                              |                |
| Alone                                                                                            | 67(14.8)                    | 6(9.0)                                      | 20(29.9)                     | 41(61.2)       |
| 2 people                                                                                         | 151(33.4)                   | 23(15.2)                                    | 40(26.5)                     | 88(58.3)       |
| 3 or more people                                                                                 | 229(50.7)                   | 22(9.6)                                     | 51(20.5)                     | 156(68.1)      |
| <b>Experience in the healthcare field</b>                                                        |                             |                                             |                              |                |
| Yes                                                                                              | 98(21.7)                    | 10(10.2)                                    | 22(22.4)                     | 66(67.3)       |
| No                                                                                               | 354(78.3)                   | 42(11.9)                                    | 89(25.1)                     | 223(63.0)      |
| <b>Financial resources at disposal from own or family income enough to get to the end of the</b> |                             |                                             |                              |                |

|                                                                     |                          |           |          |           |           |
|---------------------------------------------------------------------|--------------------------|-----------|----------|-----------|-----------|
| <b>month *</b>                                                      | More than enough/enough  | 316(69.9) | 29(12.8) | 75(16.7)  | 212(70.5) |
|                                                                     | Barely enough/Not enough | 132(29.2) | 23(17.4) | 34(25.8)  | 75(56.2)  |
|                                                                     | Refusal                  | 4(0.9)    | 0(0.0)   | 2(50.0)   | 2(50.0)   |
| <b>Family or friends support to go to doctors visit (if needed)</b> |                          |           |          |           |           |
|                                                                     | Yes                      | 388(85.8) | 44(11.3) | 98(25.3)  | 246(63.4) |
|                                                                     | No                       | 61(13.5)  | 8(13.1)  | 11(18.0)  | 42(68.9)  |
|                                                                     | Refusal                  | 3(0.7)    | 0(0.0)   | 2(66.7)   | 1(33.3)   |
| <b>Doctor visits</b>                                                |                          |           |          |           |           |
|                                                                     | 0                        | 30(6.6)   | 5(16.7)  | 6(20.0)   | 19(63.3)  |
|                                                                     | 1-2 times                | 196(43.4) | 19(9.7)  | 43(21.9)  | 134(68.4) |
|                                                                     | 3 or more times          | 226(50.0) | 28(12.4) | 62(27.4)  | 136(61.3) |
| <b>Emergency department admissions</b>                              |                          |           |          |           |           |
|                                                                     | 0                        | 351(77.7) | 37(10.5) | 83(23.6)  | 231(65.8) |
|                                                                     | 1-2 times                | 91(20.1)  | 14(15.4) | 26(28.6)  | 51(56.0)  |
|                                                                     | 3 or more times          | 10(2.2)   | 1(10.0)  | 2(20.0)   | 7(70.0)   |
| <b>Hospitalizations</b>                                             |                          |           |          |           |           |
|                                                                     | 0                        | 401(88.7) | 43(10.7) | 100(24.9) | 258(64.3) |
|                                                                     | 1-2 times                | 46(10.2)  | 9(19.6)  | 9(19.6)   | 28(60.9)  |
|                                                                     | 3 or more times          | 5(1.1)    | 0(0.0)   | 2(40.0)   | 3(60.0)   |
| <b>Outpatients specialist care access</b>                           |                          |           |          |           |           |
|                                                                     | 0                        | 61(13.5)  | 9(14.8)  | 16(26.2)  | 36(59.0)  |
|                                                                     | 1-2 times                | 162(35.8) | 15(9.3)  | 42(25.9)  | 105(64.8) |
|                                                                     | 3 or more times          | 228(50.4) | 28(12.3) | 53(23.2)  | 147(64.5) |
|                                                                     | Refusal                  | 1(0.2)    | 0(0.0)   | 0(0.0)    | 1(100)    |

^Difference between 100% and the sum of the percentages of each variable corresponds to missing values

\* $p < 0.05$

### Health literacy distribution and its associations with antecedents and consequences

The Cronbach alpha coefficient for the NVS-IT in this study was 0.741. The NVS-IT score was J-shaped (Figure 2), with mean value of  $4.05 \pm 1.88$  and median value of 4; 25% of the participants presented NVS-IT scores lower than 3. As far as the HL levels distribution in the sample was concerned, high likelihood of limited HL, possibility of limited HL and adequate HL were found in the 11.5%, 24.6% and 63.9% of the sample, respectively.

HL was significantly associated with the following variables (see Table 2): age, educational level, employment status, financial situation, number of family and non-family members in the household, self-reported health status, and the presence of long-term illnesses. Specifically, the percentage of subjects with high likelihood of limited HL was higher in the lower educational level, in the worse health status, in unemployed or retired people, in people with more than one long-term illnesses, in people living with another person, and in people with a worse financial situation.

All the potential predictors of HL were included in the first multivariate logistic regression model. The final multivariate logistic regression model for the antecedents was obtained through backward stepwise method (table 3). In particular, the risk of having inadequate and at-risk HL levels increased with age (OR = 1.07,  $p < 0.001$ ), with a lower educational level (OR = 2.02,  $p = 0.004$  and OR = 4.03;  $p < 0.001$  comparing the bachelor's degree and higher educational level group with high school degree group or with less than a high school diploma group, respectively) and with a worse financial situation (OR 1.64;  $p = 0.041$ ).

**Table 3.** Multivariate logistic regression analysis for antecedents of HL (HL is the outcome variable) - final model. OR is calculated as “Inadequate and at-risk HL” vs “adequate HL”.

|                                 | Odds Ratio | P      | 95% Confidence interval |
|---------------------------------|------------|--------|-------------------------|
| <b>Age</b>                      | 1.07       | <0.001 | 1.05-1.09               |
| <b>Education</b>                |            |        |                         |
| Bachelor’s degree and higher    | 1.000      | -      | -                       |
| High school graduates           | 2.01       | 0.004  | 1.53-3.61               |
| Less than a high school diploma | 4.03       | <0.001 | 3.41-7.49               |
| <b>Financial situation</b>      |            |        |                         |
| More than enough/Enough         | 1          | -      | -                       |
| Barely enough/Not enough        | 1.639      | 0.041  | 1.17-2.63               |

N= 448; Pseudo R<sup>2</sup>=0.1404

As far as health outcomes were concerned, HL resulted to be significantly associated only with self-reported health status at the univariate analysis. Besides HL, age, educational level, nationality, long-term illness, employment and financial status resulted to be significantly associated with self-reported health status (data reported in the Supplementary file). All the potential predictors of self-reported health status were included in the first multivariate logistic regression model with self-reported health status as the dependent variable. Results of the final model are reported in table 4. Participants with inadequate and at-risk HL were about two times more likely than participants with adequate HL to report a worse self-reported health status (OR = 2.25, p = 0.002). The presence of one or more long-term illnesses and a worse financial situation remained significantly associated with a worse self-reported health status in the final model (see table 4).

**Table 4.** Multivariate logistic regression analysis with self-reported health status as the dependent variable – final model. OR is calculated as “so-so/fair or bad health status” vs “excellent, very good or good health status”.

|                             | Odds Ratio | P      | 95% Confidence interval |
|-----------------------------|------------|--------|-------------------------|
| <b>Health literacy (HL)</b> |            |        |                         |
| Adequate HL                 | 1          | -      | -                       |
| Inadequate and at-risk HL   | 2.25       | 0.002  | 1.75-2.75               |
| <b>Long-term illness</b>    |            |        |                         |
| No                          | 1          | -      | -                       |
| One                         | 4.04       | <0.001 | 3.46-4.62               |
| More than one               | 12.78      | <0.001 | 12.1- 13.45             |
| <b>Financial situation</b>  |            |        |                         |
| More than enough/Enough     | 1          | -      | -                       |
| Barely enough/Not enough    | 2.14       | 0.004  | 1.62-2.66               |

N=448; Pseudo R<sup>2</sup>=0.1860



## DISCUSSION

The aim of this study was to assess the level of functional HL in a population-based sample using the Italian version of the NVS and explore the association of functional HL with antecedents and health outcomes.[18] Our results showed the presence of a high mean HL score in the population, and inadequate level of functional HL was present in a relatively small proportion of the population. According to multivariate analyses, the following antecedents resulted significantly associated with the level of functional HL: age, educational level and financial situation. As far as health outcomes are concerned, only self-reported health status resulted significantly associated with functional HL in the multivariate analysis.

To best of our knowledge our study is the first that has set the assessment of functional HL with the NVS tool in a population-based sample as primary outcome in Italy. However, it should be pointed out that results of our study are based on a non-representative Italian population sample (a limitation described further below). In the literature only a study of Palumbo *et al.*[28] have used the NVS tool in a population-based sample in Italy, however in this study the primary outcomes were to assess HL and its antecedents and consequences with HLS-EU-Q47 and NVS was used to check the validity of self-reported literacy skills (HLS-EU-Q47). As a result of this, several data of the NVS in the population are not reported (i.e. NVS score) and it is not possible to compare our findings with this study.

In the literature, many studies have described several antecedents that may positively or negatively impact on health literacy, however to date it is difficult to draw definitive conclusions on this topic as a variety of sampling frame, design and HL measures have been adopted in the literature.[6] Furthermore, demographic and socio-economic factors may impact differently on HL depending on the national and cultural contexts.[5, 15, 16, 29] In light of this, our findings on antecedents of functional HL not only contribute to the current debate in the literature, but also may be considered as the first attempt to highlight the independent predictors of functional HL in the Italian context.

Age and education are reported to be important predictors of HL levels in the literature.[5, 15, 16] As far as education is concerned, in our study, a higher education level resulted to be independently associated to higher functional HL levels; on the contrary, having received training or being employed in the field of healthcare does not impact on functional HL level. As the NVS tool mainly measures document literacy and numeracy, these findings may suggest that these skills are mainly developed in the context of general education with little influence by further and more specific education. Regarding age, results showed a negative independent association with functional HL suggesting that as age increases, a diminished mental alertness and/or cognitive impairment (e.g. memory-retrieval problems and inadequate numeracy) may play a crucial role in limiting the functional HL skills. Indeed, a recent study by Fawns-Ritchie *et al* argued that functional health literacy measures may, in part, assess fluid-type cognitive abilities; furthermore, Kobayashi *et al* found that age-related differences in functional HL skills are largely explained by cognitive ageing.[30, 31] Further research on this topic suggested that also educational differences may influence age-related differences in functional HL skills as education has changed over the time.[32] Considering that people with low education and older people have the highest burden of chronic diseases,[33-36] and that these diseases require a broad range of reading and numeracy skills for their management, the described associations of functional HL with education and age highlight the need to design and implement health policies tailored on HL skills in these populations.



1  
2  
3 Our findings have highlighted also that a worse financial situation is associated with lower level of  
4 functional HL. Literature, reports contrasting results concerning the association between socioeconomic  
5 status and HL measured through NVS score;[15-16, 21] however these variables has been little investigated  
6 by population-based studies which considered also the measure of functional HL. Further studies are  
7 needed to elucidate the mechanisms underlying the relationship between socioeconomic status and HL.  
8  
9

10 As regards to health outcomes, self-reported health status was found to be significantly associated with  
11 functional HL, but also with financial situation and the presence of long-term illnesses. In the literature the  
12 underlying mechanisms through which HL influences the health-related outcomes are not entirely known,  
13 and several theoretical models have been proposed to explain these mechanisms.[6, 37-39] However, none  
14 of these models have been fully validated, and further studies examining the mechanisms underlying the  
15 relationship between HL and health outcomes are needed.  
16  
17

18  
19 No other health outcomes were found to be significantly associated with functional HL in our study.  
20 Although several HL associations with health outcomes have been proposed in the literature, most of them  
21 have been evaluated in the clinical context and only few at the general population level.[5, 16-17] Because  
22 NVS was primarily designed to detect illiteracy, it may show a ceiling effect when used in general  
23 populations.[40] A ceiling effect occurs when a high proportion of participants in a study have maximum  
24 scores on the observed variable. This issue makes discrimination among participants among the top end of  
25 the scale impossible and may lead to attenuated or absent correlations between HL and other  
26 variables,[41] as described also by other Authors. [42-44] In our sample, about 30% of the participants  
27 reported the higher score at the NVS-IT. For this reason, A more in-depth evaluation of the presence and  
28 effects of skewed distribution of NVS is needed in order to better adjust and calibrate this HL screening tool  
29 to use it appropriately in the general population, which in turn may permit to draw more robust  
30 conclusions on the presence and strengths of HL associations with health outcomes.  
31  
32  
33  
34

35 In this study, telephone interviews were used to collect NVS-IT data, while in almost all the studies face-to-  
36 face interviews were used. To date, to the best of our knowledge, our study is the first in reporting the  
37 comparison of NVS data collected using different methods of administration. The comparison of the NVS  
38 score between face-to-face and telephone interviews showed an excellent agreement with no significant  
39 difference between the NVS scores. Compared with face-to-face interviews, telephone interviews offer  
40 several advantages,[45] in particular the elimination of any bias caused by the appearance of the  
41 interviewer. Furthermore, it should be pointed out that the application of NVS may cause stress and shame  
42 feelings in people with low numeracy/low literacy skills, possibly discouraging their participation in the  
43 interview. In this light, it may be argued that the willingness to participate to an interview that may cause  
44 shame and stress is higher if the interview is phone-administered.[45] However, to the best of our  
45 knowledge, no studies have specifically compared the participation rates between telephone and face-to-  
46 face NVS interviews, and future research is needed to elucidate whether the telephone mode may  
47 encourage the participation of people with low literacy/numeracy skills in NVS interviews. On the other  
48 hand, the main potential risk with telephone interview compared with face-to face is that the respondent  
49 may seek help from another person at home; however, this risk is minor,[45] since the interviewer would  
50 be able to notice the involvement of other people (*i.e.*, the person on the phone would have to repeat each  
51 question or use the hands-free mode).  
52  
53  
54  
55  
56  
57  
58  
59  
60

1  
2  
3 This is the first study in Italy that comprehensively attempts to assess functional HL and its related  
4 antecedents and outcomes with NVS in a population-based sample. This consideration, together with the  
5 evaluation of various potential functional HL consequences, antecedents, and confounding factors, should  
6 be considered as the strengths of this study.  
7  
8

9 Nevertheless, the study has several limitations. First, the population-based sample was obtained with a  
10 combination of convenience and probability sampling procedures. Thus, data cannot be considered  
11 representative of the overall Italian or Florentine adult population, and this is a major limitation for  
12 external comparison of the study results. Secondly, as the variables have been self-reported by the  
13 participants through interviews, the study may have suffered the recognized limitations of using this  
14 approach, such as recall or social desirability bias.[45] However, the telephone interview may have limited  
15 this potential bias especially for those variables potentially more influenced by social desirability such as  
16 the BMI and socioeconomic Status. As for recall bias, it should be underlined that the length of recall period  
17 for health services use (*i.e.* last 12 months) may have affected the accuracy or completeness of the  
18 information retrieved from study participants, especially for GPs visits. This period was selected in order to  
19 allow for comparability with other studies.[5, 16] Thirdly, results may have been influenced by a non-  
20 response bias, however the extent of this potential bias – if present - is limited as participants and non-  
21 participants showed only a small difference in the mean age: since participants were older of two years on  
22 average than non-participants the functional HL level resulted in our sample may be slightly lower than in  
23 the general population. Lastly, although participants were randomly selected from the registers of the GPs,  
24 the GPs were selected using a convenience criteria, which may have introduced a selection bias. However,  
25 it should be pointed out that the geographical coverage of the sample included residents of different areas  
26 of Florence as the selected GPs were based in different districts of the city.  
27  
28  
29  
30  
31  
32  
33  
34

## 35 CONCLUSION

36  
37 Our study is the first in measuring the functional HL with NVS tool and its associations with antecedents  
38 and consequences at population level in Italy. Our findings highlighted the presence of good level of  
39 functional HL in the population compared to the EU average. However, older, less educated and poorer  
40 population groups resulted at higher risk of limited or inadequate functional HL. These results suggest the  
41 need to design and implement health policies and interventions tailored on different HL levels in order to  
42 allow the more vulnerable population groups to better cope with the health challenges. As far as health  
43 outcomes are concerned, only self-reported health status was found to be significantly associated with  
44 functional HL among the considered health outcomes. The underlying mechanisms through which HL  
45 influences the health-related outcomes are not entirely known and a more in-depth evaluation of these  
46 relationships are needed. As NVS test was originally developed in the clinical context, a ceiling effect that  
47 may skew the HL levels distribution in the population may occur when NVS is used at the general  
48 population level, ultimately leading to attenuated correlation between HL and its potential predictors and  
49 consequences. Further studies investigating the presence and effects of this ceiling effect is needed in  
50 order to confirm the validity or better calibrate the NVS tool for the general population studies and to draw  
51 more robust conclusions on the presence and strengths of functional HL associations.  
52  
53  
54  
55  
56  
57  
58  
59  
60

1  
2  
3  
4  
5  
6  
7  
8  
9  
10  
11  
12  
13  
14  
15  
16  
17  
18  
19  
20  
21  
22  
23  
24  
25  
26  
27  
28  
29  
30  
31  
32  
33  
34  
35  
36  
37  
38  
39  
40  
41  
42  
43  
44  
45  
46  
47  
48  
49  
50  
51  
52  
53  
54  
55  
56  
57  
58  
59  
60

## ACKNOWLEDGMENTS

The authors gratefully acknowledge Dr. Flavio Godi, Mauro Grazini and Poste Italiane for their assistance in the study implementation and conduct. The authors also thank the subjects whose participation made this study possible

## COMPETING INTERESTS

The authors declare no competing interests

## FUNDING STATEMENTS

This research received no specific grant from any funding agency in the public, commercial or not-for-profit sectors

## DATA SHARING STATEMENT

The datasets generated during and/or analysed during the current study are available from the corresponding author on reasonable request

## AUTHOR CONTRIBUTION

GB: conception and design; drafted the article; gave final approval of the version to be submitted.

VL: conception and design; data collection; data interpretation; drafted the article; gave final approval of the version to be submitted; final preparation and submission.

VV: conception and design; data collection; data interpretation; drafted the article; gave final approval of the version to be submitted.

CL: conception and design; data analysis and interpretation; drafted the article; gave final approval of the version to be submitted.

Florence Health Literacy Research Group: conception and design; data collection; gave final approval of the version to be submitted

## FIGURE LEGEND

Figure 1. Scatterplots of the NVS-IT scores at T0 and T1 of the pre-testing phase.

Figure 2. Distribution of NVS-IT score

## REFERENCES

1. Kickbush I, Maag D. Health Literacy. In: Heggenhougen K, Quah S, eds. International encyclopedia of public health volume 3. San Diego, CA: *Academic Press* 2008:204-211.

- 1
- 2
- 3 2. World Health Organisation Regional Office for Europe. Health 2020. A European Policy Framework
- 4 Supporting Action Across Government and Society for Health and Well-Being. Copenhagen: World
- 5 Health Organisation Regional Office for Europe; 2012
- 6
- 7 3. European Commission. Together for Health. A Strategic Approach for the EU 2008–2013. COM(2007)
- 8 630 final. Brussels: European Commission, 2007.
- 9
- 10 4. Berkman ND, Sheridan SL, Donahue KE, et al. Low health literacy and health outcomes: an updated
- 11 systematic review. *Ann Intern Med* 2011;155(2):97-107. doi:10.7326/0003-4819-155-2-201107190-
- 12 00005
- 13
- 14 5. HLS-EU Consortium. 2012. Comparative report on health literacy in eight EU member states. The
- 15 European health literacy survey HLS-EU. [http://ec.europa.eu/chafea/documents/news/Comparative\\_](http://ec.europa.eu/chafea/documents/news/Comparative_report_on_health_literacy_in_eight_EU_member_states.pdf)
- 16 [report\\_on\\_health\\_literacy\\_in\\_eight\\_EU\\_member\\_states.pdf](http://ec.europa.eu/chafea/documents/news/Comparative_report_on_health_literacy_in_eight_EU_member_states.pdf)
- 17
- 18 6. Sørensen K, Van den Broucke S, Fullam J, et al. Health literacy and public health: a systematic review
- 19 and integration of definitions and models. *BMC Public Health* 2012;12(1):80. doi:10.1186/1471-2458-12-80
- 20
- 21 7. Altin SV, Finke I, Kautz-Freimuth S, et al. The evolution of health literacy assessment tools: a systematic
- 22 review. *BMC Public Health* 2014;14:1207. doi:10.1186/1471-2458-14-1207
- 23
- 24 8. Nguyen TH, Paasche-Orlow MK, McCormack LA. The state of the science of health literacy
- 25 measurement. *Stud Health Technol Inform* 2017;240:17-33.
- 26
- 27 9. Weiss BD, Mays MZ, Martz W, et al. Quick assessment of literacy in primary care: the newest vital sign.
- 28 *Ann Fam Med* 2005;3(6):514–22.
- 29
- 30 10. Osborn CY, Weiss BD, Davis TC, et al. Measuring adult literacy in health care: performance of the
- 31 newest vital sign. *Am J Health Behav* 2007;31 Suppl 1:S36-46. doi:10.5555/ajhb.2007.31.suppl.S36
- 32
- 33 11. Shah LC, West P, Bremmeyr K, et al. Health literacy instrument in family medicine: the "newest vital
- 34 sign" ease of use and correlates. *J Am Board Fam Med* 2010;23(2):195-203.
- 35 doi:10.3122/jabfm.2010.02.070278
- 36
- 37 12. Powers BJ, Trinh JV, Bosworth HB. Can this patient read and understand written health information?
- 38 *JAMA* 2010;304(1):76-84. doi:10.1001/jama.2010.896
- 39
- 40 13. Strijbos RM, Hinnen JW, van den Haak RFF, et al. Inadequate health literacy in patients with arterial
- 41 vascular disease. *Eur J Vasc Endovasc Surg* 2018; 1-7. doi:10.1016/j.ejvs.2018.04.015
- 42
- 43 14. Batterham RW, Hawkins M, Collins PA, et al. Health literacy: applying current concepts to improve
- 44 health services and reduce health inequalities. *Public Health* 2016;132:3-12.
- 45 doi:10.1016/j.puhe.2016.01.001
- 46
- 47 15. Paiva D, Silva S, Severo M, et al. Limited health literacy in Portugal assessed with the newest vital sign.
- 48 *Acta Med Port* 2017;30(12):861-869. doi:10.20344/amp.9135
- 49
- 50 16. Adams RJ, Appleton SL, Hill CL, et al. Risks associated with low functional health literacy in an Australian
- 51 population. *Med J Aust* 2009;191(10), 530-534.
- 52
- 53 17. Rowlands G, Protheroe J, Winkley J, et al. A mismatch between population health literacy and the
- 54 complexity of health information: an observational study. *Br J Gen Pract*. 2015;65(635):e379-86.
- 55
- 56 18. Capecchi L, Guazzini A, Lorini C, et al. The first Italian validation of the most widespread health literacy
- 57 assessment tool: the newest vital sign. *Epidemiol Prev* 2015;39(4 Suppl 1):124–8.
- 58
- 59 19. Bonaccorsi G, Grazzini M, Pieri L, et al. Assessment of health Literacy and validation of single-item
- 60 literacy screener (SILS) in a sample of Italian people. *Ann Ist Super Sanita* 2017;53(3):205-212.
- doi:10.4415/ANN\_17\_03\_05
20. Zotti P, Cocchi S, Polesel J, et al. Cross-cultural validation of health literacy measurement tools in Italian
- oncology patients. *BMC Health Serv Res* 2017;17(1):410. doi: 10.1186/s12913-017-2359-0

1  
2  
3  
4  
5  
6  
7  
8  
9  
10  
11  
12  
13  
14  
15  
16  
17  
18  
19  
20  
21  
22  
23  
24  
25  
26  
27  
28  
29  
30  
31  
32  
33  
34  
35  
36  
37  
38  
39  
40  
41  
42  
43  
44  
45  
46  
47  
48  
49  
50  
51  
52  
53  
54  
55  
56  
57  
58  
59  
60

21. Barber MN, Staples M, Osborne RH, et al. Up to a quarter of the Australian population may have suboptimal health literacy depending upon the measurement tool: results from a population-based survey. *Health Promot Int* 2009;24, 3: 252–261. doi:10.1093/heapro/dap022
22. Lorini C, Santomauro F, Grazzini M, et al. Health literacy in Italy: a cross-sectional study protocol to assess the health literacy level in a population-based sample, and to validate health literacy measures in the Italian language. *BMJ Open* 2017;7:e017812. doi:10.1136/bmjopen-2017-017812
23. Toçi E, Burazeri G, Myftiu S, et al. Health literacy in a population-based sample of adult men and women in a South Eastern European country. *J Public Health (Oxf)* 2016;38(1):6–13. doi:10.1093/pubmed/fdv006
24. Park MS, Kang KJ, Jang SJ, Lee JY, Chang SJ. Evaluating test-retest reliability in patient-reported outcome measures for older people: A systematic review. *Int J Nurs Stud* 2018;79:58-69. doi: 10.1016/j.ijnurstu.2017.11.003.
25. Bujanga MA, Baharum N. Guidelines of the minimum sample size requirements for Cohen’s Kappa. *Epidemiology Biostatistics and Public Health* 2017;e12267:1-10. doi: 10.2427/12267
26. Bujanga MA, Baharum N. A simplified guide to determination of sample size requirements for estimating the value of intraclass correlation coefficient: a review. *Arch Orofac Sci* 2017;12(1):1-11.
27. Cicchetti DV. Guidelines, criteria, and rules of thumb for evaluating normed and standardized assessment instruments in psychology. *Psychological Assessment* 1994;6(4):284–290. doi:10.1037/1040-3590.6.4.284.
28. Palumbo R, Annarumma C, Adinolfi P, et al. The Italian health literacy project: insights from the assessment of health literacy skills in Italy. *Health Policy* 2016;120(9):1087-94. doi:10.1016/j.healthpol.2016.08.007
29. Bakker CJ, Koffel JB, Theis-Mahon NR. Measuring the health literacy of the Upper Midwest. *J Med Libr Assoc* 2017;105(1):34-43. doi:10.5195/jmla.2017.105
30. Fawns-Ritchie CF, Starr JM, Deary IJ. Role of cognitive ability in the association between functional health literacy and mortality in the Lothian Birth Cohort 1936: a prospective cohort study. *BMJ Open* 2018;8:e022502. doi:10.1136/bmjopen-2018-022502
31. Kobayashi LC, Smith SG, O’Conor R, et al. The role of cognitive function in the relationship between age and health literacy: a cross-sectional analysis of older adults in Chicago, USA. *BMJ open*. 2015;5(4):e007222.
32. Morrow D, Clark D, Tu W, et al. Correlates of health literacy in patients with chronic heart failure. *Gerontologist* 2006;46:669–76. doi:10.1093/geront/46.5.669
33. GBD 2016 Causes of Death Collaborators. Global, regional, and national age-sex specific mortality for 264 causes of death, 1980–2016: a systematic analysis for the Global Burden of Disease Study 2016. *Lancet* 2017;390(10100):1151-1210. doi:10.1016/S0140-6736(17)32152-9
34. Steenland K, Henley J, Thun M. All-cause and cause-specific death rates by educational status for two million people in two American Cancer Society cohorts, 1959-1996. *Am J Epidemiol* 2002;156(1):11-21. doi:10.1093/aje/kwf001
35. Qureshi AI, Suri MF, Saad M, et al. Educational attainment and risk of stroke and myocardial infarction. *Med Sci Monit* 2003;9(11):CR466-73.
36. Silventoinen K, Pankow J, Jousilahti P, et al. Educational inequalities in the metabolic syndrome and coronary heart disease among middle-aged men and women. *Int J Epidemiol* 2005;34(2):327-34. doi:10.1093/ije/dyi007
37. Nutbeam D. Health literacy as a public health goal: a challenge for contemporary health education and communication strategies into the 21st century. *Health Promot Int* 2000;15:259–67. doi:10.1093/heapro/15.3.259

- 1  
2  
3 38. Paasche-Orlow MK, Wolf MS. The causal pathways linking health literacy to health outcomes. *Am J Health Behav* 2007;31 Suppl 1:S19–26. doi:10.5555/ajhb.2007.31.suppl.S19
- 4  
5 39. von Wagner C, Steptoe A, Wolf MS, et al. Health literacy and health actions: a review and a framework from health psychology. *Health Educ Behav* 2009;36(5):860–77. doi:10.1177/1090198108322819
- 6  
7 40. Reeve CL, Basalik D. Is health literacy an example of construct proliferation? A conceptual and empirical evaluation of its redundancy with general cognitive ability. *Intelligence* 2014;44:93-102. doi:10.1016/j.intell.2014.03.004
- 8  
9 41. Fransen MP, Van Schaik TM, Twickler TB, Essink-Bot ML. Applicability of internationally available health literacy measures in the Netherlands. *J Health Commun* 2011;16 Suppl 3:134-149. doi: 10.1080/10810730.2011.604383.
- 10  
11 42. Lindau ST, Tomori C, Lyons T, Langseth L, Bennett CL, Garcia P. The association of health literacy with cervical cancer prevention knowledge and health behaviors in a multiethnic cohort of women. *Am J Obstet Gynecol*. 2002 May;186(5):938-43.
- 12  
13 43. Okamoto M, Kyutoku Y, Sawada M, Clowney L, Watanabe E, Dan I, Kawamoto K. Health numeracy in Japan: measures of basic numeracy account for framing bias in a highly numerate population. *BMC Med Inform Decis Mak* 2012;12:104. doi: 10.1186/1472-6947-12-104.
- 14  
15 44. Suka M, Odajima T, Okamoto M, Sumitani M, Igarashi A, Ishikawa H, Kusama M, Yamamoto M, Nakayama T, Sugimori H. Relationship between health literacy, health information access, health behavior, and health status in Japanese people. *Patient Educ Couns* 2015;98(5):660-8. doi: 10.1016/j.pec.2015.02.013
- 16  
17 45. Streiner DL, Norman GR. Health measurement scales. A practical guide to their development and use. Oxford:Oxford University Press, 2008.
- 18  
19  
20  
21  
22  
23  
24  
25  
26  
27  
28  
29  
30  
31  
32  
33  
34  
35  
36  
37  
38  
39  
40  
41  
42  
43  
44  
45  
46  
47  
48  
49  
50  
51  
52  
53  
54  
55  
56  
57  
58  
59  
60

1  
2  
3  
4  
5  
6  
7  
8  
9  
10  
11  
12  
13  
14  
15  
16  
17  
18  
19  
20  
21  
22  
23  
24  
25  
26  
27  
28  
29  
30  
31  
32  
33  
34  
35  
36  
37  
38  
39  
40  
41  
42  
43  
44  
45  
46  
47  
48  
49  
50  
51  
52  
53  
54  
55  
56  
57  
58  
59  
60

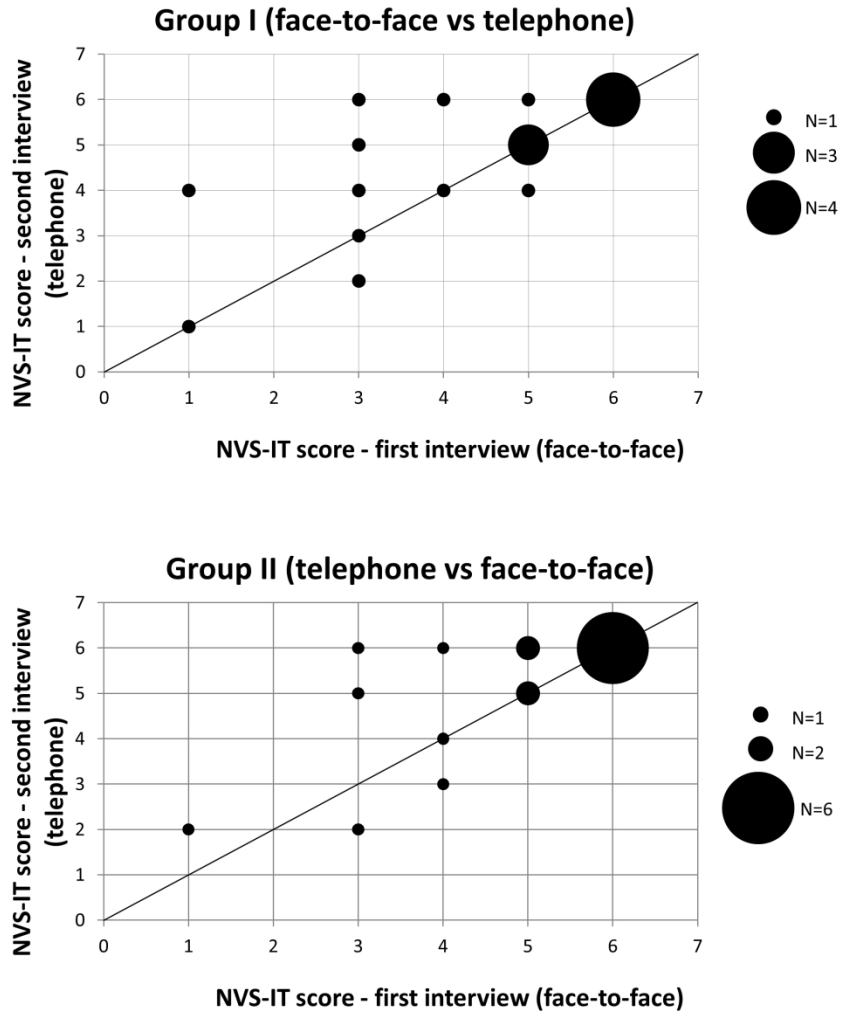

Figure 1. Scatterplots of the NVS-IT scores at T0 and T1 of the pre-testing phase.  
190x254mm (300 x 300 DPI)

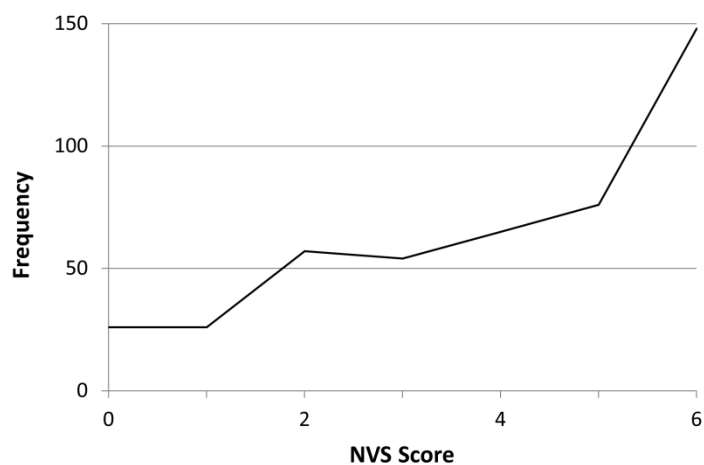

Figure 2. Distribution of NVS-IT score

254x190mm (300 x 300 DPI)



**Supplementary table: self-perceived health status (excellent or good; average or poor) by associated factors**

|                                                                                                                            | Self-perceived health status        |                                    |                            |
|----------------------------------------------------------------------------------------------------------------------------|-------------------------------------|------------------------------------|----------------------------|
|                                                                                                                            | Excellent/good<br>N (%)             | Average/poor<br>N (%)              | Total<br>N (%)             |
| <b>Educational level (Chi2 test, p&lt;0.01)</b>                                                                            |                                     |                                    |                            |
| Bachelor's degree and higher                                                                                               | 157 (84.4)                          | 29 (15.6)                          | 186 (100)                  |
| High school degree                                                                                                         | 146 (76.4)                          | 45 (23.6)                          | 191 (100)                  |
| Less than high school diploma                                                                                              | 45 (60.8)                           | 29 (39.2)                          | 74 (100)                   |
| <b>Employment status (Chi2 test, p=0.028)</b>                                                                              |                                     |                                    |                            |
| Employed                                                                                                                   | 242 (80.9)                          | 57 (19.1)                          | 299 (100)                  |
| Unemployed or retired                                                                                                      | 39 (69.6)                           | 17 (30.4)                          | 56 (100)                   |
| Retired                                                                                                                    | 67 (69.8)                           | 29 (30.2)                          | 96 (100)                   |
| <b>Long-term illness (Chi2 test, p&lt;0.01)</b>                                                                            |                                     |                                    |                            |
| No                                                                                                                         | 215 (90.7)                          | 22 (9.3)                           | 237 (100)                  |
| One                                                                                                                        | 105 (71.4)                          | 42 (28.6)                          | 147 (100)                  |
| More than one                                                                                                              | 28 (41.8)                           | 39 (58.2)                          | 67 (100)                   |
| <b>Financial resources at disposal from own or family income enough to get to the end of the month (Chi2 test, p=0.01)</b> |                                     |                                    |                            |
| More than enough/Enough                                                                                                    | 258 (81.6)                          | 58 (18.4)                          | 316 (100)                  |
| Barely enough/Not enough                                                                                                   | 88 (66.7)                           | 44 (33.3)                          | 132 (100)                  |
|                                                                                                                            | <b>Excellent/good<br/>mean ± SD</b> | <b>Average/ poor<br/>mean ± SD</b> | <b>Total<br/>mean ± SD</b> |
| <b>Age (Mann-Whitney U test for independent sample, p=0.001)</b>                                                           | 52.1 ± 12.2                         | 57.1 ± 8.9                         | 53.23 ± 11.7               |

**STROBE 2007 (v4) Statement—Checklist of items that should be included in reports of *cross-sectional studies***

| Section/Topic                | Item # | Recommendation                                                                                                                                                                       | Reported on page # |
|------------------------------|--------|--------------------------------------------------------------------------------------------------------------------------------------------------------------------------------------|--------------------|
| <b>Title and abstract</b>    | 1      | (a) Indicate the study's design with a commonly used term in the title or the abstract                                                                                               | 1; 2               |
|                              |        | (b) Provide in the abstract an informative and balanced summary of what was done and what was found                                                                                  | 2                  |
| <b>Introduction</b>          |        |                                                                                                                                                                                      |                    |
| Background/rationale         | 2      | Explain the scientific background and rationale for the investigation being reported                                                                                                 | 3                  |
| Objectives                   | 3      | State specific objectives, including any prespecified hypotheses                                                                                                                     | 4                  |
| <b>Methods</b>               |        |                                                                                                                                                                                      |                    |
| Study design                 | 4      | Present key elements of study design early in the paper                                                                                                                              | 4; 5               |
| Setting                      | 5      | Describe the setting, locations, and relevant dates, including periods of recruitment, exposure, follow-up, and data collection                                                      | 4; 5               |
| Participants                 | 6      | (a) Give the eligibility criteria, and the sources and methods of selection of participants                                                                                          | 4                  |
| Variables                    | 7      | Clearly define all outcomes, exposures, predictors, potential confounders, and effect modifiers. Give diagnostic criteria, if applicable                                             | 5                  |
| Data sources/<br>measurement | 8*     | For each variable of interest, give sources of data and details of methods of assessment (measurement). Describe comparability of assessment methods if there is more than one group | 4; 5               |
| Bias                         | 9      | Describe any efforts to address potential sources of bias                                                                                                                            | 4; 5; 6            |
| Study size                   | 10     | Explain how the study size was arrived at                                                                                                                                            | 4; 5               |
| Quantitative variables       | 11     | Explain how quantitative variables were handled in the analyses. If applicable, describe which groupings were chosen and why                                                         | 5; 6               |
| Statistical methods          | 12     | (a) Describe all statistical methods, including those used to control for confounding                                                                                                | 5; 6               |
|                              |        | (b) Describe any methods used to examine subgroups and interactions                                                                                                                  | 5; 6               |
|                              |        | (c) Explain how missing data were addressed                                                                                                                                          |                    |
|                              |        | (d) If applicable, describe analytical methods taking account of sampling strategy                                                                                                   |                    |
|                              |        | (e) Describe any sensitivity analyses                                                                                                                                                |                    |
| <b>Results</b>               |        |                                                                                                                                                                                      |                    |

|                          |     |                                                                                                                                                                                                              |              |
|--------------------------|-----|--------------------------------------------------------------------------------------------------------------------------------------------------------------------------------------------------------------|--------------|
| Participants             | 13* | (a) Report numbers of individuals at each stage of study—eg numbers potentially eligible, examined for eligibility, confirmed eligible, included in the study, completing follow-up, and analysed            | 8            |
|                          |     | (b) Give reasons for non-participation at each stage                                                                                                                                                         | 8            |
|                          |     | (c) Consider use of a flow diagram                                                                                                                                                                           |              |
| Descriptive data         | 14* | (a) Give characteristics of study participants (eg demographic, clinical, social) and information on exposures and potential confounders                                                                     | 7; 8; 9; 10  |
|                          |     | (b) Indicate number of participants with missing data for each variable of interest                                                                                                                          | 9; 10        |
| Outcome data             | 15* | Report numbers of outcome events or summary measures                                                                                                                                                         | 7; 9; 10     |
| Main results             | 16  | (a) Give unadjusted estimates and, if applicable, confounder-adjusted estimates and their precision (eg, 95% confidence interval). Make clear which confounders were adjusted for and why they were included | 8; 9; 10; 11 |
|                          |     | (b) Report category boundaries when continuous variables were categorized                                                                                                                                    |              |
|                          |     | (c) If relevant, consider translating estimates of relative risk into absolute risk for a meaningful time period                                                                                             |              |
| Other analyses           | 17  | Report other analyses done—eg analyses of subgroups and interactions, and sensitivity analyses                                                                                                               |              |
| <b>Discussion</b>        |     |                                                                                                                                                                                                              |              |
| Key results              | 18  | Summarise key results with reference to study objectives                                                                                                                                                     | 12           |
| Limitations              | 19  | Discuss limitations of the study, taking into account sources of potential bias or imprecision. Discuss both direction and magnitude of any potential bias                                                   | 14           |
| Interpretation           | 20  | Give a cautious overall interpretation of results considering objectives, limitations, multiplicity of analyses, results from similar studies, and other relevant evidence                                   | 12; 13; 14   |
| Generalisability         | 21  | Discuss the generalisability (external validity) of the study results                                                                                                                                        | 14           |
| <b>Other information</b> |     |                                                                                                                                                                                                              |              |
| Funding                  | 22  | Give the source of funding and the role of the funders for the present study and, if applicable, for the original study on which the present article is based                                                | 15           |

\*Give information separately for cases and controls in case-control studies and, if applicable, for exposed and unexposed groups in cohort and cross-sectional studies.

**Note:** An Explanation and Elaboration article discusses each checklist item and gives methodological background and published examples of transparent reporting. The STROBE checklist is best used in conjunction with this article (freely available on the Web sites of PLoS Medicine at <http://www.plosmedicine.org/>, Annals of Internal Medicine at <http://www.annals.org/>, and Epidemiology at <http://www.epidem.com/>). Information on the STROBE Initiative is available at [www.strobe-statement.org](http://www.strobe-statement.org).
