# Supplementary material for: Functional health literacy in a population-based sample in Florence: a cross-sectional study using the Newest Vital Sign
Source: PubMed Central journal article supplement — BMJ Open. 2019 Jun 19;9(6):e026356. doi: 10.1136/bmjopen-2018-026356 (PMC6589023; doi:10.1136/bmjopen-2018-026356), 2019-06-19
Supplement: bmjopen-2018-026356supp001.pdf [file bmjopen-2018-026356supp001.pdf]

**Supplementary table: self-perceived health status (excellent or good; average or poor) by associated factors**

|                                                                                                                            | Self-perceived health status        |                                    |                            |
|----------------------------------------------------------------------------------------------------------------------------|-------------------------------------|------------------------------------|----------------------------|
|                                                                                                                            | Excellent/good<br>N (%)             | Average/poor<br>N (%)              | Total<br>N (%)             |
| <b>Educational level (Chi2 test, p&lt;0.01)</b>                                                                            |                                     |                                    |                            |
| Bachelor's degree and higher                                                                                               | 157 (84.4)                          | 29 (15.6)                          | 186 (100)                  |
| High school degree                                                                                                         | 146 (76.4)                          | 45 (23.6)                          | 191 (100)                  |
| Less than high school diploma                                                                                              | 45 (60.8)                           | 29 (39.2)                          | 74 (100)                   |
| <b>Employment status (Chi2 test, p=0.028)</b>                                                                              |                                     |                                    |                            |
| Employed                                                                                                                   | 242 (80.9)                          | 57 (19.1)                          | 299 (100)                  |
| Unemployed or retired                                                                                                      | 39 (69.6)                           | 17 (30.4)                          | 56 (100)                   |
| Retired                                                                                                                    | 67 (69.8)                           | 29 (30.2)                          | 96 (100)                   |
| <b>Long-term illness (Chi2 test, p&lt;0.01)</b>                                                                            |                                     |                                    |                            |
| No                                                                                                                         | 215 (90.7)                          | 22 (9.3)                           | 237 (100)                  |
| One                                                                                                                        | 105 (71.4)                          | 42 (28.6)                          | 147 (100)                  |
| More than one                                                                                                              | 28 (41.8)                           | 39 (58.2)                          | 67 (100)                   |
| <b>Financial resources at disposal from own or family income enough to get to the end of the month (Chi2 test, p=0.01)</b> |                                     |                                    |                            |
| More than enough/Enough                                                                                                    | 258 (81.6)                          | 58 (18.4)                          | 316 (100)                  |
| Barely enough/Not enough                                                                                                   | 88 (66.7)                           | 44 (33.3)                          | 132 (100)                  |
|                                                                                                                            | <b>Excellent/good<br/>mean ± SD</b> | <b>Average/ poor<br/>mean ± SD</b> | <b>Total<br/>mean ± SD</b> |
| <b>Age (Mann-Whitney U test for independent sample, p=0.001)</b>                                                           | 52.1 ± 12.2                         | 57.1 ± 8.9                         | 53.23 ± 11.7               |
